# Supplementary material for: Dual Activities of an X-family DNA Polymerase Regulate CRISPR-Induced Insertional Mutagenesis Across Species
Source: Research Square preprint supplement (doi:10.21203/rs.3.rs-3851715/v1), 2024-01-19
Supplement: Supplementary file 1 [file 4ed7a80e8ce43a533bc2f1a6.xlsx]

## Sheet: Sheet1
Supplementary Table 1. Summary of CRISPR target sites
		Target site ID	guide RNA sequence
Arabidopsis thaliana	1	MCsite_T_1	TAGGTGGACTATGCAGTCAATGG
	2	MCsite_T_8	TAGGTGGACTATGCAGTCAATGG
	3	MCsite5_T_7	TAGGTGGACTATGCAGTCAATGG
	4	MCsite5_T_6	TAGGTGGACTATGCAGTCAATGG
	5	MCsite5_T_5	TAGGTGGACTATGCAGTCAATGG
	6	MCsite5_T_4	TAGGTGGACTATGCAGTCAATGG
	7	MCsite5_T_3	TAGGTGGACTATGCAGTCAATGG
	8	MCsite4_G_9	GTTTTCTCGCACTTAAGCTCTGG
	9	MCsite4_G_8	GTTTTCTCGCACTTAAGCTCTGG
	10	MCsite4_G_7	GTTTTCTCGCACTTAAGCTCTGG
	11	MCsite4_G_5	GTTTTCTCGCACTTAAGCTCTGG
	12	MCsite4_G_4	GTTTTCTCGCACTTAAGCTCTGG
	13	MCsite4_G_3	GTTTTCTCGCACTTAAGCTCTGG
	14	MCsite4_G_2	GTTTTCTCGCACTTAAGCTCTGG
	15	MCsite4_G_1	GTTTTCTCGCACTTAAGCTCTGG
	16	fwa_gRNA9_C	CCAAAACCAGGTGAAGCTGAAGG
	17	fwa_gRNA8_G	CCTTCAGCTTCACCTGGTTTTGG
	18	fwa_gRNA17_A	TCTTTGCACGTACCGTATTATGG
	19	fwa_gRNA_51_T	TAATCCAGAAGAGTCTTGGTTGG
	20	fwa_gRNA_50_C	TTTTCCAACCAAGACTCTTCTGG
	21	fwa_gRNA_41_T	CAAGGCCTGTCCAAATTTAGTGG
	22	fwa_gRNA_39_A	TTTCGGTTCTCCACTAAATTTGG
	23	fwa_gRNA_26_G	CAACTCTCTCAAAGCCGTAATGG
	24	fwa_gRNA_18_G	TTGAGGATGAGAGAGAGAGGTGG
	25	fwa_gRNA_16_C	CAGAAGTGTATACATGCATGTGG
	26	CHL2_gRNA	CGACATTCATAACAGAGACATGG
Setaria viridis	1	ms45_gRNA2	CTCATGATCATCGGCCGGAGCGG
	2	ms45_gRNA1	CACGACAAGGAGGAATTCTGCGG
	3	ms26_gRNA8	CTGTAGTAGTCAACGTGTTAAGG
	4	ms26_gRNA2	ATTCACCGGGTCCGCGATGTAGG
	5	ms26_gRNA1	CGTCCTCCTCTCGTGGATCCTGG
	6	MET1a_gRNA2	ATGATGATGCAAAATTAGCTAGG
	7	JK010_gRNA1	GCTCAAGCACCCCACGCGGGTGG
	8	JK008_gRNA1	CAGCTGGTGGATGTGGAACTAGG
	9	JK004_gRNA1	CGAGCAACGAGCGGCAGCCATGG
	10	JK003_gRNA1	AGGAGGAGGAGCAGCAGCCATGG
	11	JK001_gRNA1	AGCTACAGCTACAGCAGCAATGG
	12	IBM2_gRNA3	GTCACAGAATGCTCACACTGGGG
	13	IBM2_gRNA2	AACATTAGCTGCATTCGGACTGG
	14	IBM2_gRNA1	ATATTTAAAAAGCCCTGTGAAGG
	15	HSFB2b_gRNA3	GACCCGTTGCAGGCTCGGAGCGG
	16	HSF6A1_gRNA2	TGCTTGACCGTCACGGCGGTGGG
	17	H2A.W_N	TCGAAGCGCAGCCGCTGCCATGG
	18	H2A.W_C	AGTCCCCCAAGAAGGCTTAGAGG
	19	edm2c_gRNA3	TTAGAGGACATCACTGAGAGTGG
	20	edm2c_gRNA2	TACATCAAAGATAGCCAGTGGGG
	21	edm2c_gRNA1	GTGCAACCTTAGGCTACAGCAGG
	22	edm2b_gRNA3	CTTTCAGTGTAAAGGCCTAGAGG
	23	edm2b_gRNA2	GTTTGTGCTATCTGTGACAATGG
	24	edm2b_gRNA1	AGCCCTGCACCGCTCTCAGCCGG
	25	edm2a_gRNA3	GTTTGATGTTAGACCCTCAGAGG
	26	drm1b_gRNA2	AATGCCTCTCCCAAACCCAATGG
	27	drm1b_gRNA1	GTGTATGGACGACGATATCACGG
	28	drm1a_gRNA1	TTGCCGTCTTGGGTCCCACGAGG
	29	CMT3b_gRNA1	GTGCATCCCACTCCTTAAGGAGG
	30	CMT3a_gRNA2	GGTTAAACCCACTTATCCCTTGG
	31	CMT3a_gRNA1	GATGTGGGTTCGGATTCAGCAGG
	32	CMT2_gRNA1	TTGCAAGATATGCTCTAAGCCGG
	33	MET1b_gRANA2	GCTCAAGCACCCCACGCGGGTGG
Human	1	hg19_15_90348326_90348348_sgRNP_HEK293_STSS_48hr_None	GTTCGACTACGTGGAGAAGCAGG
	2	hg19_15_40987441_40987463_sgRNP_K562_STSS_48hr_None	AGTTCCCAGCTGCACGCCTCGGG
	3	hg19_X_66765045_66765067_sgRNP_K562_STSS_48hr_None	ACAGATTCTGGAAAGCTCCTCGG
	4	hg19_1_198608162_198608184_sgRNP_HCT116_STSS_48hr_None	CTAGGTGATGATGTCAGATTCGG
	5	hg19_X_66765119_66765141_sgRNP_HEK293_STSS_48hr_None	GCCGGGAGGTGCTGCGCTCGCGG
	6	hg19_X_133594290_133594312_sgRNP_HCT116_STSS_48hr_None	GCTCAGGAGGAGGAAGCCGGTGG
	7	hg19_17_37883173_37883195_sgRNP_K562_STSS_48hr_None	GGACAGAAGAAGCCCTGCTGGGG
	8	hg19_2_191835123_191835145_sgRNP_HEK293_STSS_48hr_None	GAATGAGGGTCCTTTGGGAAAGG
	9	hg19_13_32893351_32893373_sgRNP_K562_STSS_48hr_None	GAAGCCAGCTGATTATAAGATGG
	10	hg19_2_216977803_216977825_sgRNP_HEK293_STSS_48hr_None	CTTCTTTGCTTGTTCAAATGGGG
	11	hg19_13_108863525_108863547_sgRNP_HCT116_STSS_48hr_None	GAACGAATACAGAAAAGTAAAGG
	12	hg19_2_191835123_191835145_sgRNP_K562_STSS_48hr_None	GAATGAGGGTCCTTTGGGAAAGG
	13	hg19_7_50633109_50633131_sgRNP_HCT116_STSS_48hr_None	GAAGAGGGAAACGTGTGGCTTGG
	14	hg19_15_90348585_90348607_sgRNP_HEK293_STSS_48hr_None	CATCACGCTTATCCACCCCAAGG
	15	hg19_13_32889655_32889677_sgRNP_K562_STSS_48hr_None	GAGGCGCAGCAGTGCCACAGCGG
	16	hg19_15_40987441_40987463_sgRNP_HEK293_STSS_48hr_None	AGTTCCCAGCTGCACGCCTCGGG
	17	hg19_7_50526196_50526218_sgRNP_K562_STSS_48hr_None	GCAACTTGAAATTATATCTGTGG
	18	hg19_17_37883173_37883195_sgRNP_HEK293_STSS_48hr_None	GGACAGAAGAAGCCCTGCTGGGG
	19	hg19_X_66765045_66765067_sgRNP_HEK293_STSS_48hr_None	ACAGATTCTGGAAAGCTCCTCGG
	20	hg19_15_90348655_90348677_sgRNP_HEK293_STSS_48hr_None	AGATGCAGGCTGCAGATGCCCGG
	21	hg19_22_42017322_42017344_sgRNP_K562_STSS_48hr_None	GCGCAGGGAAGCGACCAACTTGG
	22	hg19_22_42032578_42032600_sgRNP_HCT116_STSS_48hr_None	ATCCGTGGCCCATCATGTCTTGG
	23	hg19_2_216974144_216974166_sgRNP_HCT116_STSS_48hr_None	GCACCATGTTGCCGGTCCTCAGG
	24	hg19_1_65311293_65311315_sgRNP_HEK293_STSS_48hr_None	GTGGAAGAGTTTGTGGAAGGGGG
	25	hg19_2_216974069_216974091_sgRNP_K562_STSS_48hr_None	GGTGGACAAGCGGCAGATAGCGG
	26	hg19_16_29708698_29708720_sgRNP_HCT116_STSS_48hr_None	GGGCACTGGAGCCACCTCTTTGG
	27	hg19_22_37532281_37532303_sgRNP_HCT116_STSS_48hr_None	GGAGCCAGCCCCTGGCCTTCAGG
	28	hg19_15_90348326_90348348_sgRNP_HCT116_STSS_48hr_None	GTTCGACTACGTGGAGAAGCAGG
	29	hg19_15_90348585_90348607_sgRNP_K562_STSS_48hr_None	CATCACGCTTATCCACCCCAAGG
	30	hg19_X_66765045_66765067_sgRNP_HCT116_STSS_48hr_None	ACAGATTCTGGAAAGCTCCTCGG
	31	hg19_17_40440261_40440283_sgRNP_HEK293_STSS_48hr_None	GGCCCTCGGCGGCGGCTCCCAGG
	32	hg19_15_90348655_90348677_sgRNP_K562_STSS_48hr_None	AGATGCAGGCTGCAGATGCCCGG
	33	hg19_X_138644010_138644032_sgRNP_K562_STSS_48hr_None	ACAGAACATGTTGTTATAGATGG
	34	hg19_13_32889655_32889677_sgRNP_HEK293_STSS_48hr_None	GAGGCGCAGCAGTGCCACAGCGG
	35	hg19_19_17952223_17952245_sgRNP_HCT116_STSS_48hr_None	GCCGAGGCTGCTGGAGGAAGTGG
	36	hg19_1_208073318_208073340_sgRNP_HEK293_STSS_48hr_None	TTCATGAGTCTTGACAACAACGG
	37	hg19_11_836348_836370_sgRNP_HEK293_STSS_48hr_None	GCCCGCCACCACCAGGATGTAGG
	38	hg19_15_40987441_40987463_sgRNP_HCT116_STSS_48hr_None	AGTTCCCAGCTGCACGCCTCGGG
	39	hg19_11_836294_836316_sgRNP_K562_STSS_48hr_None	GCTGATGTAGTCACTCTTGAGGG
	40	hg19_17_40440261_40440283_sgRNP_K562_STSS_48hr_None	GGCCCTCGGCGGCGGCTCCCAGG
	41	hg19_X_138643957_138643979_sgRNP_K562_STSS_48hr_None	GGTCAACAAGTGGAACTCTAAGG
	42	hg19_15_90348585_90348607_sgRNP_HCT116_STSS_48hr_None	CATCACGCTTATCCACCCCAAGG
	43	hg19_2_191835123_191835145_sgRNP_HCT116_STSS_48hr_None	GAATGAGGGTCCTTTGGGAAAGG
	44	hg19_X_138643957_138643979_sgRNP_HEK293_STSS_48hr_None	GGTCAACAAGTGGAACTCTAAGG
	45	hg19_22_42017322_42017344_sgRNP_HEK293_STSS_48hr_None	GCGCAGGGAAGCGACCAACTTGG
	46	hg19_1_65349086_65349108_sgRNP_K562_STSS_48hr_None	GAGGAGCTCCAAGAAGACTGAGG
	47	hg19_17_40466373_40466395_sgRNP_K562_STSS_48hr_None	GAAGAGGGGGAGAGAGTTACAGG
	48	hg19_2_216977803_216977825_sgRNP_HCT116_STSS_48hr_None	CTTCTTTGCTTGTTCAAATGGGG
	49	hg19_1_183218409_183218431_sgRNP_HEK293_STSS_48hr_None	GGGAGGGCTGTGCTGCTAGTGGG
	50	hg19_17_40440261_40440283_sgRNP_HCT116_STSS_48hr_None	GGCCCTCGGCGGCGGCTCCCAGG
	51	hg19_1_65312386_65312408_sgRNP_HEK293_STSS_48hr_None	GGCAGCCAGCATGATGAGACAGG
	52	hg19_17_40481444_40481466_sgRNP_K562_STSS_48hr_None	GAGCAGAGATGTGGGAATGGGGG
	53	hg19_7_55220290_55220312_sgRNP_HEK293_STSS_48hr_None	GTTGTGGCAGCAGTCACTGGGGG
	54	hg19_19_17953906_17953928_sgRNP_HCT116_STSS_48hr_None	GCAGGGTGAGTGTCTCAGCCTGG
	55	hg19_1_65311293_65311315_sgRNP_HCT116_STSS_48hr_None	GTGGAAGAGTTTGTGGAAGGGGG
	56	hg19_2_216974069_216974091_sgRNP_HEK293_STSS_48hr_None	GGTGGACAAGCGGCAGATAGCGG
	57	hg19_13_32893351_32893373_sgRNP_HEK293_STSS_48hr_None	GAAGCCAGCTGATTATAAGATGG
	58	hg19_17_40466373_40466395_sgRNP_HEK293_STSS_48hr_None	GAAGAGGGGGAGAGAGTTACAGG
	59	hg19_1_208073318_208073340_sgRNP_HCT116_STSS_48hr_None	TTCATGAGTCTTGACAACAACGG
	60	hg19_8_39871134_39871156_sgRNP_HEK293_STSS_48hr_None	GGAGTATTTCAGGGGCTCTTGGG
	61	hg19_13_32889655_32889677_sgRNP_HCT116_STSS_48hr_None	GAGGCGCAGCAGTGCCACAGCGG
	62	hg19_7_50526196_50526218_sgRNP_HEK293_STSS_48hr_None	GCAACTTGAAATTATATCTGTGG
	63	hg19_1_65349086_65349108_sgRNP_HEK293_STSS_48hr_None	GAGGAGCTCCAAGAAGACTGAGG
	64	hg19_15_90348655_90348677_sgRNP_HCT116_STSS_48hr_None	AGATGCAGGCTGCAGATGCCCGG
	65	hg19_17_37883173_37883195_sgRNP_HCT116_STSS_48hr_None	GGACAGAAGAAGCCCTGCTGGGG
	66	hg19_8_39871134_39871156_sgRNP_K562_STSS_48hr_None	GGAGTATTTCAGGGGCTCTTGGG
	67	hg19_1_55529322_55529344_sgRNP_K562_STSS_48hr_None	GGGCTGAGAGAGGGACAAGTCGG
	68	hg19_17_40481444_40481466_sgRNP_HEK293_STSS_48hr_None	GAGCAGAGATGTGGGAATGGGGG
	69	hg19_13_32900720_32900742_sgRNP_K562_STSS_48hr_None	ACAGTAGAACTAAGGGTGGGTGG
	70	hg19_22_37523901_37523923_sgRNP_K562_STSS_48hr_None	GAACTGTGTGTGTTGCAGGGGGG
	71	hg19_22_42017322_42017344_sgRNP_HCT116_STSS_48hr_None	GCGCAGGGAAGCGACCAACTTGG
	72	hg19_1_183218409_183218431_sgRNP_HCT116_STSS_48hr_None	GGGAGGGCTGTGCTGCTAGTGGG
	73	hg19_17_40458414_40458436_sgRNP_HEK293_STSS_48hr_None	GGCCACTGTAGTCCTCCAGGTGG
	74	hg19_X_138644010_138644032_sgRNP_HEK293_STSS_48hr_None	ACAGAACATGTTGTTATAGATGG
	75	hg19_1_65312386_65312408_sgRNP_HCT116_STSS_48hr_None	GGCAGCCAGCATGATGAGACAGG
	76	hg19_17_40466373_40466395_sgRNP_HCT116_STSS_48hr_None	GAAGAGGGGGAGAGAGTTACAGG
	77	hg19_17_40458414_40458436_sgRNP_K562_STSS_48hr_None	GGCCACTGTAGTCCTCCAGGTGG
	78	hg19_7_50526196_50526218_sgRNP_HCT116_STSS_48hr_None	GCAACTTGAAATTATATCTGTGG
	79	hg19_1_65349086_65349108_sgRNP_HCT116_STSS_48hr_None	GAGGAGCTCCAAGAAGACTGAGG
	80	hg19_13_32893351_32893373_sgRNP_HCT116_STSS_48hr_None	GAAGCCAGCTGATTATAAGATGG
	81	hg19_13_32900720_32900742_sgRNP_HEK293_STSS_48hr_None	ACAGTAGAACTAAGGGTGGGTGG
	82	hg19_7_55220290_55220312_sgRNP_HCT116_STSS_48hr_None	GTTGTGGCAGCAGTCACTGGGGG
	83	hg19_11_836294_836316_sgRNP_HEK293_STSS_48hr_None	GCTGATGTAGTCACTCTTGAGGG
	84	hg19_11_836348_836370_sgRNP_HCT116_STSS_48hr_None	GCCCGCCACCACCAGGATGTAGG
	85	hg19_17_40481444_40481466_sgRNP_HCT116_STSS_48hr_None	GAGCAGAGATGTGGGAATGGGGG
	86	hg19_1_55529322_55529344_sgRNP_HEK293_STSS_48hr_None	GGGCTGAGAGAGGGACAAGTCGG
	87	hg19_X_138644010_138644032_sgRNP_HCT116_STSS_48hr_None	ACAGAACATGTTGTTATAGATGG
	88	hg19_2_216974069_216974091_sgRNP_HCT116_STSS_48hr_None	GGTGGACAAGCGGCAGATAGCGG
	89	hg19_22_37523901_37523923_sgRNP_HEK293_STSS_48hr_None	GAACTGTGTGTGTTGCAGGGGGG
	90	hg19_17_40458414_40458436_sgRNP_HCT116_STSS_48hr_None	GGCCACTGTAGTCCTCCAGGTGG
	91	hg19_X_138643957_138643979_sgRNP_HCT116_STSS_48hr_None	GGTCAACAAGTGGAACTCTAAGG
	92	hg19_8_39871134_39871156_sgRNP_HCT116_STSS_48hr_None	GGAGTATTTCAGGGGCTCTTGGG
	93	hg19_13_32900720_32900742_sgRNP_HCT116_STSS_48hr_None	ACAGTAGAACTAAGGGTGGGTGG
	94	hg19_22_37523901_37523923_sgRNP_HCT116_STSS_48hr_None	GAACTGTGTGTGTTGCAGGGGGG
	95	hg19_11_836294_836316_sgRNP_HCT116_STSS_48hr_None	GCTGATGTAGTCACTCTTGAGGG
	96	hg19_1_55529322_55529344_sgRNP_HCT116_STSS_48hr_None	GGGCTGAGAGAGGGACAAGTCGG
	97	hg19_8_39845460_39845482_sgRNP_HEK293_STSS_48hr_None	GTAGAGAAAGAAGCAGTGCCTGG
	98	hg19_22_42032569_42032591_sgRNP_HEK293_STSS_48hr_None	AAAACGTTTCCAAGACATGATGG
	99	hg19_4_145041692_145041714_sgRNP_HCT116_STSS_48hr_None	AGTGTGCATTGCCACCTCAGTGG
	100	hg19_7_55259538_55259560_sgRNP_K562_STSS_48hr_None	GAGAAAGAATACCATGCAGAAGG
	101	hg19_1_198668758_198668780_sgRNP_K562_STSS_48hr_None	ACTGACACGCAGACATTCAGCGG
	102	hg19_16_29708389_29708411_sgRNP_HEK293_STSS_48hr_None	GCCGTGCAGGCAGCTGAGGCTGG
	103	hg19_X_66765028_66765050_sgRNP_K562_STSS_48hr_None	CCGCCGTCCAAGACCTACCGAGG
	104	hg19_1_208084624_208084646_sgRNP_HCT116_STSS_48hr_None	TCCCAAAGGCGGAGGGCGTTAGG
	105	hg19_13_32889668_32889690_sgRNP_HCT116_STSS_48hr_None	GCTGCGCCTCTGCTGCGCCTCGG
	106	hg19_2_216977772_216977794_sgRNP_K562_STSS_48hr_None	ACCATGAGTAACTCCATTCCTGG
	107	hg19_1_208084624_208084646_sgRNP_HEK293_STSS_48hr_None	TCCCAAAGGCGGAGGGCGTTAGG
	108	hg19_22_42017308_42017330_sgRNP_HCT116_STSS_48hr_None	TTGTCGTCTTCTGTCCAAGTTGG
	109	hg19_2_216981433_216981455_sgRNP_K562_STSS_48hr_None	GGCACTGACAATCCCCTTTCTGG
	110	hg19_22_37461708_37461730_sgRNP_K562_STSS_48hr_None	CGAAGCTGGAATCTGCTCTCTGG
	111	hg19_1_208084624_208084646_sgRNP_K562_STSS_48hr_None	TCCCAAAGGCGGAGGGCGTTAGG
	112	hg19_1_198608242_198608264_sgRNP_HEK293_STSS_48hr_None	CTCGTCTGATAAGACAACAGTGG
	113	hg19_7_55259538_55259560_sgRNP_HEK293_STSS_48hr_None	GAGAAAGAATACCATGCAGAAGG
	114	hg19_22_42032718_42032740_sgRNP_HEK293_STSS_48hr_None	ATGACAGTGCCAAAGCCAGCCGG
	115	hg19_4_156826243_156826265_sgRNP_HCT116_STSS_48hr_None	GAACTGCAAAGTGAAACAAAAGG
	116	hg19_15_40987404_40987426_sgRNP_HCT116_STSS_48hr_None	CGGCCAGAGACCGAGCCCTAAGG
	117	hg19_1_198668758_198668780_sgRNP_HEK293_STSS_48hr_None	ACTGACACGCAGACATTCAGCGG
	118	hg19_15_40987404_40987426_sgRNP_HEK293_STSS_48hr_None	CGGCCAGAGACCGAGCCCTAAGG
	119	hg19_8_39845460_39845482_sgRNP_HCT116_STSS_48hr_None	GTAGAGAAAGAAGCAGTGCCTGG
	120	hg19_16_29708389_29708411_sgRNP_HCT116_STSS_48hr_None	GCCGTGCAGGCAGCTGAGGCTGG
	121	hg19_2_216977772_216977794_sgRNP_HEK293_STSS_48hr_None	ACCATGAGTAACTCCATTCCTGG
	122	hg19_1_65432129_65432151_sgRNP_K562_STSS_48hr_None	GCTGAGGAGGGGTCGCGGCGAGG
	123	hg19_15_40987404_40987426_sgRNP_K562_STSS_48hr_None	CGGCCAGAGACCGAGCCCTAAGG
	124	hg19_1_65432129_65432151_sgRNP_HEK293_STSS_48hr_None	GCTGAGGAGGGGTCGCGGCGAGG
	125	hg19_22_37461708_37461730_sgRNP_HEK293_STSS_48hr_None	CGAAGCTGGAATCTGCTCTCTGG
	126	hg19_1_198608242_198608264_sgRNP_HCT116_STSS_48hr_None	CTCGTCTGATAAGACAACAGTGG
	127	hg19_7_55259538_55259560_sgRNP_HCT116_STSS_48hr_None	GAGAAAGAATACCATGCAGAAGG
	128	hg19_1_198668758_198668780_sgRNP_HCT116_STSS_48hr_None	ACTGACACGCAGACATTCAGCGG
	129	hg19_X_66765028_66765050_sgRNP_HEK293_STSS_48hr_None	CCGCCGTCCAAGACCTACCGAGG
	130	hg19_X_66765028_66765050_sgRNP_HCT116_STSS_48hr_None	CCGCCGTCCAAGACCTACCGAGG
	131	hg19_2_216977772_216977794_sgRNP_HCT116_STSS_48hr_None	ACCATGAGTAACTCCATTCCTGG
	132	hg19_10_89506437_89506459_sgRNP_K562_STSS_48hr_None	GCATACAGTGATTTGATGAAAGG
	133	hg19_22_42032569_42032591_sgRNP_HCT116_STSS_48hr_None	AAAACGTTTCCAAGACATGATGG
	134	hg19_4_156825204_156825226_sgRNP_HEK293_STSS_48hr_None	GAAGAAGACAAATCACAAACTGG
	135	hg19_4_156825204_156825226_sgRNP_HCT116_STSS_48hr_None	GAAGAAGACAAATCACAAACTGG
	136	hg19_2_216981433_216981455_sgRNP_HEK293_STSS_48hr_None	GGCACTGACAATCCCCTTTCTGG
	137	hg19_2_73160982_73161004_sgRNP_K562_STSS_48hr_None	GAGTCCGAGCAGAAGAAGAAGGG
	138	hg19_1_65432129_65432151_sgRNP_HCT116_STSS_48hr_None	GCTGAGGAGGGGTCGCGGCGAGG
	139	hg19_4_156825228_156825250_sgRNP_HEK293_STSS_48hr_None	GTGAATAGAGCCAGCAAAGGAGG
	140	hg19_4_156825228_156825250_sgRNP_HCT116_STSS_48hr_None	GTGAATAGAGCCAGCAAAGGAGG
	141	hg19_22_42032718_42032740_sgRNP_HCT116_STSS_48hr_None	ATGACAGTGCCAAAGCCAGCCGG
	142	hg19_22_37461708_37461730_sgRNP_HCT116_STSS_48hr_None	CGAAGCTGGAATCTGCTCTCTGG
	143	hg19_1_208072334_208072356_sgRNP_K562_STSS_48hr_None	ATAGGAGAAGATGATGTATAGGG
	144	hg19_2_216981433_216981455_sgRNP_HCT116_STSS_48hr_None	GGCACTGACAATCCCCTTTCTGG
	145	hg19_2_73160982_73161004_sgRNP_HEK293_STSS_48hr_None	GAGTCCGAGCAGAAGAAGAAGGG
	146	hg19_10_89506437_89506459_sgRNP_HEK293_STSS_48hr_None	GCATACAGTGATTTGATGAAAGG
	147	hg19_2_73160982_73161004_sgRNP_HCT116_STSS_48hr_None	GAGTCCGAGCAGAAGAAGAAGGG
	148	hg19_1_208072334_208072356_sgRNP_HEK293_STSS_48hr_None	ATAGGAGAAGATGATGTATAGGG
	149	hg19_10_89506437_89506459_sgRNP_HCT116_STSS_48hr_None	GCATACAGTGATTTGATGAAAGG
	150	hg19_1_208072334_208072356_sgRNP_HCT116_STSS_48hr_None	ATAGGAGAAGATGATGTATAGGG
Fire Fly		Luciferase_iPAM_T	AATTGTCTTGTCCCTATCGAAGG
		Luciferase_iPAM_G	TGTGCCAGAGTCCTTCGATAGGG
Note: The PAM sequences were highlighted in red. The -4th nucleotides were indicated in blue.
