# Supplementary material for: Dual Activities of an X-family DNA Polymerase Regulate CRISPR-Induced Insertional Mutagenesis Across Species
Source: Research Square preprint supplement (doi:10.21203/rs.3.rs-3851715/v1), 2024-01-19
Supplement: Supplementary file 2 [file 76689f6a93bbc4e9d293b09e.xlsx]

## Sheet: Sheet2
Supplementary Table 3. Summary of oligonucleotides used in this study
Species	Plasmid	Target sites	Oligo Name	oligo sequence	Assembly Note
Arabidopsis thaliana	pTW069	MCsite5_gRNA1, MCsite5_8_gRNA1, MCsite5_7_gRNA1, MCsite5_6_gRNA1, MCsite5_5_gRNA1, MCsite5_4_gRNA1, MCsite5_3_gRNA1, CHL2_gRNA1	https://doi.org/10.1093/plphys/kiac285	https://doi.org/10.1093/plphys/kiac285	https://doi.org/10.1093/plphys/kiac285	Cermak et al. protocol
Arabidopsis thaliana	pTW072	MCsite4_gRNA9, MCsite4_gRNA8, MCsite4_gRNA7, MCsite4_gRNA5, MCsite4_gRNA4, MCsite4_gRNA3, MCsite4_gRNA2, MCsite4_gRNA1, CHL2_gRNA1	https://doi.org/10.1093/plphys/kiac285	https://doi.org/10.1093/plphys/kiac285	https://doi.org/10.1093/plphys/kiac285	Cermak et al. protocol
Setaria viridis	pMG201	ms45_gRNA2, ms26_gRNA2	https://doi.org/10.1093/plcell/koad139	https://doi.org/10.1093/plcell/koad139	https://doi.org/10.1093/plcell/koad139	Cermak et al. protocol
Setaria viridis	pMG198	ms45_gRNA1, ms26_gRNA1	https://doi.org/10.1093/plcell/koad139	https://doi.org/10.1093/plcell/koad139	https://doi.org/10.1093/plcell/koad139	Cermak et al. protocol
Setaria viridis	pTW118	ms26_gRNA8	33_oCmYLCV	TGCTCTTCGCGCTGGCAGACATACTGTCCCAC	PCR RXN 1	Cermak et al. protocol pMOD_B assembly
Setaria viridis	pTW118	ms26_gRNA8	490_TRNA_seq1_Ms26_gRNA8	TCGTCTCCTGACTACTACAGTGCACCAGCCGGGAATCG	PCR RXN 1	Cermak et al. protocol pMOD_B assembly
Setaria viridis	pTW118	ms26_gRNA8	491_REP_seq1_Ms26_gRNA8	TCGTCTCAGTCAACGTGTTAGTTTTAGAGCTAGAAATAGC	PCR RXN 2	Cermak et al. protocol pMOD_B assembly
Setaria viridis	pTW118	ms26_gRNA8	35_TRNA_term	TGCTCTTCTGACTGCACCAGCCGGGAATCG	PCR RXN 2	Cermak et al. protocol pMOD_B assembly
Setaria viridis	pTW096	MET1a_gRNA2	320_oCmYLCV	TGCTCTTCGCGCTGGCAGACATACTGTCCCAC	PCR RXN 1	Cermak et al. protocol pMOD_B assembly
Setaria viridis	pTW096	MET1a_gRNA2	321_TRNA_seq1	TCGTCTCCAAATGTCTACATTGCACCAGCCGGGAATCG	PCR RXN 1	Cermak et al. protocol pMOD_B assembly
Setaria viridis	pTW096	MET1a_gRNA2	322_REP_seq1	TCGTCTCAATTTTTCTGTGAGTTTTAGAGCTAGAAATAGC	PCR RXN 2	Cermak et al. protocol pMOD_B assembly
Setaria viridis	pTW096	MET1a_gRNA2	323_TRNA_seq2	TCGTCTCCTTGCATCATCATTGCACCAGCCGGGAATCG	PCR RXN 2	Cermak et al. protocol pMOD_B assembly
Setaria viridis	pTW096	MET1a_gRNA2	324_REP_seq2	TCGTCTCAGCAAAATTAGCTGTTTTAGAGCTAGAAATAGC	PCR RXN 3	Cermak et al. protocol pMOD_B assembly
Setaria viridis	pTW096	MET1a_gRNA2	325_TRNA_seq3	TCGTCTCCTGCAACAGTCTTTGCACCAGCCGGGAATCG	PCR RXN 3	Cermak et al. protocol pMOD_B assembly
Setaria viridis	pTW096	MET1a_gRNA2	326_REP_seq3	TCGTCTCATGCAGGAAGAGGGTTTTAGAGCTAGAAATAGC	PCR RXN 4	Cermak et al. protocol pMOD_B assembly
Setaria viridis	pTW096	MET1a_gRNA2	327_TRNA_term	TGCTCTTCTGACTGCACCAGCCGGGAATCG	PCR RXN 4	Cermak et al. protocol pMOD_B assembly
Setaria viridis	pJK010	gRNA1 RNA polymerase sigma factor, region 2	33_oCmYLCV	TGCTCTTCGCGCTGGCAGACATACTGTCCCAC	PCR RXN 1	Cermak et al. protocol pMOD_B assembly
Setaria viridis	pJK010	gRNA1 RNA polymerase sigma factor, region 2	oJK59	TCGTCTCCGGGTGCTTGAGCTGCACCAGCCGGGAATCG	PCR RXN 1	Cermak et al. protocol pMOD_B assembly
Setaria viridis	pJK010	gRNA1 RNA polymerase sigma factor, region 2	oJK60	TCGTCTCAACCCCACGCGGGGTTTTAGAGCTAGAAATAGC	PCR RXN 2	Cermak et al. protocol pMOD_B assembly
Setaria viridis	pJK010	gRNA1 RNA polymerase sigma factor, region 2	327_TRNA_term	TGCTCTTCTGACTGCACCAGCCGGGAATCG	PCR RXN 2	Cermak et al. protocol pMOD_B assembly
Setaria viridis	pJK008	gRNA2 Helix-turn-helix motif, Homeobox domain, Homeobox, conserved site, Homeobox-like domain superfamily, Leucine zipper, homeobox-associated	33_oCmYLCV	TGCTCTTCGCGCTGGCAGACATACTGTCCCAC	PCR RXN 1	Cermak et al. protocol pMOD_B assembly
Setaria viridis	pJK008	gRNA2 Helix-turn-helix motif, Homeobox domain, Homeobox, conserved site, Homeobox-like domain superfamily, Leucine zipper, homeobox-associated	oJK55	TCGTCTCCATCCACCAGCTGTGCACCAGCCGGGAATCG	PCR RXN 1	Cermak et al. protocol pMOD_B assembly
Setaria viridis	pJK008	gRNA2 Helix-turn-helix motif, Homeobox domain, Homeobox, conserved site, Homeobox-like domain superfamily, Leucine zipper, homeobox-associated	oJK56	TCGTCTCAGGATGTGGAACTGTTTTAGAGCTAGAAATAGC	PCR RXN 2	Cermak et al. protocol pMOD_B assembly
Setaria viridis	pJK008	gRNA2 Helix-turn-helix motif, Homeobox domain, Homeobox, conserved site, Homeobox-like domain superfamily, Leucine zipper, homeobox-associated	327_TRNA_term	TGCTCTTCTGACTGCACCAGCCGGGAATCG	PCR RXN 2	Cermak et al. protocol pMOD_B assembly
Setaria viridis	pJK004	gRNA1 photosystem II oxygen evolving polypeptide2	33_oCmYLCV	TGCTCTTCGCGCTGGCAGACATACTGTCCCAC	PCR RXN 1	Cermak et al. protocol pMOD_B assembly
Setaria viridis	pJK004	gRNA1 photosystem II oxygen evolving polypeptide2	oJK47	TCGTCTCCGCTCGTTGCTCGTGCACCAGCCGGGAATCG	PCR RXN 1	Cermak et al. protocol pMOD_B assembly
Setaria viridis	pJK004	gRNA1 photosystem II oxygen evolving polypeptide2	oJK48	TCGTCTCAGAGCGGCAGCCAGTTTTAGAGCTAGAAATAGC	PCR RXN 2	Cermak et al. protocol pMOD_B assembly
Setaria viridis	pJK004	gRNA1 photosystem II oxygen evolving polypeptide2	327_TRNA_term	TGCTCTTCTGACTGCACCAGCCGGGAATCG	PCR RXN 2	Cermak et al. protocol pMOD_B assembly
Setaria viridis	pJK003	gRNA1 photosystem II subunit29	33_oCmYLCV	TGCTCTTCGCGCTGGCAGACATACTGTCCCAC	PCR RXN 1	Cermak et al. protocol pMOD_B assembly
Setaria viridis	pJK003	gRNA1 photosystem II subunit29	oJK45	TCGTCTCCGCTCCTCCTCCTTGCACCAGCCGGGAATCG	PCR RXN 1	Cermak et al. protocol pMOD_B assembly
Setaria viridis	pJK003	gRNA1 photosystem II subunit29	oJK46	TCGTCTCAGAGCAGCAGCCAGTTTTAGAGCTAGAAATAGC	PCR RXN 2	Cermak et al. protocol pMOD_B assembly
Setaria viridis	pJK003	gRNA1 photosystem II subunit29	327_TRNA_term	TGCTCTTCTGACTGCACCAGCCGGGAATCG	PCR RXN 2	Cermak et al. protocol pMOD_B assembly
Setaria viridis	pJK001	gRNA1 photosystem II3	33_oCmYLCV	TGCTCTTCGCGCTGGCAGACATACTGTCCCAC	PCR RXN 1	Cermak et al. protocol pMOD_B assembly
Setaria viridis	pJK001	gRNA1 photosystem II3	oJK41	TCGTCTCCGTAGCTGTAGCTTGCACCAGCCGGGAATCG	PCR RXN 1	Cermak et al. protocol pMOD_B assembly
Setaria viridis	pJK001	gRNA1 photosystem II3	oJK42	TCGTCTCACTACAGCAGCAAGTTTTAGAGCTAGAAATAGC	PCR RXN 2	Cermak et al. protocol pMOD_B assembly
Setaria viridis	pJK001	gRNA1 photosystem II3	327_TRNA_term	TGCTCTTCTGACTGCACCAGCCGGGAATCG	PCR RXN 2	Cermak et al. protocol pMOD_B assembly
Setaria viridis	pTW128	gRNA2 H2A.W	https://doi.org/10.1093/plcell/koad139	https://doi.org/10.1093/plcell/koad139	https://doi.org/10.1093/plcell/koad139	Cermak et al. protocol pMOD_B assembly
Setaria viridis	pTW126	gRNA1 H2A.W	506_SvH2A_TRNA_seq1	TCGTCTCCGCTGCGCTTCGATGCACCAGCCGGGAATCG	PCR RXN 1	Cermak et al. protocol pMOD_B assembly
Setaria viridis	pTW126	gRNA1 H2A.W	507_SvH2A_REP_seq1	TCGTCTCACAGCCGCTGCCAGTTTTAGAGCTAGAAATAGC	PCR RXN 2	Cermak et al. protocol pMOD_B assembly
Setaria viridis	pTW0041	drm1a_gRNA1, drm1b_gRNA1, drm1b_gRNA2	https://doi.org/10.1111/tpj.14949	https://doi.org/10.1111/tpj.14949	https://doi.org/10.1111/tpj.14949	Cermak et al. protocol
Setaria viridis	pTW182	edm2a_gRNA3, edm2b_gRNA1, edm2b_gRNA2, edm2b_gRNA3, edm2c_gRNA1, edm2c_gRNA2, edm2c_gRNA3, IBM2_gRNA1, IBM2_gRNA2, IBM2_gRNA3	33_oCmYLCV	TGCTCTTCGCGCTGGCAGACATACTGTCCCAC	PCR RXN 1	Cermak et al. protocol pMOD_B assembly
Setaria viridis	pTW182	edm2a_gRNA3, edm2b_gRNA1, edm2b_gRNA2, edm2b_gRNA3, edm2c_gRNA1, edm2c_gRNA2, edm2c_gRNA3, IBM2_gRNA1, IBM2_gRNA2, IBM2_gRNA3	1238_TRNA_seq1	TCGTCTCCCTTTTTAAATATTGCACCAGCCGGGAATCG	PCR rxn 1	Cermak et al. protocol pMOD_B assembly
Setaria viridis	pTW182	edm2a_gRNA3, edm2b_gRNA1, edm2b_gRNA2, edm2b_gRNA3, edm2c_gRNA1, edm2c_gRNA2, edm2c_gRNA3, IBM2_gRNA1, IBM2_gRNA2, IBM2_gRNA3	1239_REP_seq1	TCGTCTCAAAAGCCCTGTGAGTTTTAGAGCTAGAAATAGC	PCR rxn 2	Cermak et al. protocol pMOD_B assembly
Setaria viridis	pTW182	edm2a_gRNA3, edm2b_gRNA1, edm2b_gRNA2, edm2b_gRNA3, edm2c_gRNA1, edm2c_gRNA2, edm2c_gRNA3, IBM2_gRNA1, IBM2_gRNA2, IBM2_gRNA3	1240_TRNA_seq2	TCGTCTCCTAGGGACACCGATGCACCAGCCGGGAATCG	PCR rxn 2	Cermak et al. protocol pMOD_B assembly
Setaria viridis	pTW182	edm2a_gRNA3, edm2b_gRNA1, edm2b_gRNA2, edm2b_gRNA3, edm2c_gRNA1, edm2c_gRNA2, edm2c_gRNA3, IBM2_gRNA1, IBM2_gRNA2, IBM2_gRNA3	1241_REP_seq2	TCGTCTCACCTATGCCGGAGGTTTTAGAGCTAGAAATAGC	PCR rxn 3	Cermak et al. protocol pMOD_B assembly
Setaria viridis	pTW182	edm2a_gRNA3, edm2b_gRNA1, edm2b_gRNA2, edm2b_gRNA3, edm2c_gRNA1, edm2c_gRNA2, edm2c_gRNA3, IBM2_gRNA1, IBM2_gRNA2, IBM2_gRNA3	1242_TRNA_seq3	TCGTCTCCCGGTGCAGGGCTTGCACCAGCCGGGAATCG	PCR rxn 3	Cermak et al. protocol pMOD_B assembly
Setaria viridis	pTW182	edm2a_gRNA3, edm2b_gRNA1, edm2b_gRNA2, edm2b_gRNA3, edm2c_gRNA1, edm2c_gRNA2, edm2c_gRNA3, IBM2_gRNA1, IBM2_gRNA2, IBM2_gRNA3	1243_REP_seq3	TCGTCTCAACCGCTCTCAGCGTTTTAGAGCTAGAAATAGC	PCR rxn 4	Cermak et al. protocol pMOD_B assembly
Setaria viridis	pTW182	edm2a_gRNA3, edm2b_gRNA1, edm2b_gRNA2, edm2b_gRNA3, edm2c_gRNA1, edm2c_gRNA2, edm2c_gRNA3, IBM2_gRNA1, IBM2_gRNA2, IBM2_gRNA3	1244_TRNA_seq4	TCGTCTCCCTAAGGTTGCACTGCACCAGCCGGGAATCG	PCR rxn 4	Cermak et al. protocol pMOD_B assembly
Setaria viridis	pTW182	edm2a_gRNA3, edm2b_gRNA1, edm2b_gRNA2, edm2b_gRNA3, edm2c_gRNA1, edm2c_gRNA2, edm2c_gRNA3, IBM2_gRNA1, IBM2_gRNA2, IBM2_gRNA3	1245_REP_seq4	TCGTCTCATTAGGCTACAGCGTTTTAGAGCTAGAAATAGC	PCR rxn 5	Cermak et al. protocol pMOD_B assembly
Setaria viridis	pTW182	edm2a_gRNA3, edm2b_gRNA1, edm2b_gRNA2, edm2b_gRNA3, edm2c_gRNA1, edm2c_gRNA2, edm2c_gRNA3, IBM2_gRNA1, IBM2_gRNA2, IBM2_gRNA3	1246_TRNA_seq5	TCGTCTCCGCAGCTAATGTTTGCACCAGCCGGGAATCG	PCR rxn 5	Cermak et al. protocol pMOD_B assembly
Setaria viridis	pTW182	edm2a_gRNA3, edm2b_gRNA1, edm2b_gRNA2, edm2b_gRNA3, edm2c_gRNA1, edm2c_gRNA2, edm2c_gRNA3, IBM2_gRNA1, IBM2_gRNA2, IBM2_gRNA3	1247_REP_seq5	TCGTCTCACTGCATTCGGACGTTTTAGAGCTAGAAATAGC	PCR rxn 6	Cermak et al. protocol pMOD_B assembly
Setaria viridis	pTW182	edm2a_gRNA3, edm2b_gRNA1, edm2b_gRNA2, edm2b_gRNA3, edm2c_gRNA1, edm2c_gRNA2, edm2c_gRNA3, IBM2_gRNA1, IBM2_gRNA2, IBM2_gRNA3	1248_TRNA_seq6	TCGTCTCCTCTTGCATTCAGTGCACCAGCCGGGAATCG	PCR rxn 6	Cermak et al. protocol pMOD_B assembly
Setaria viridis	pTW182	edm2a_gRNA3, edm2b_gRNA1, edm2b_gRNA2, edm2b_gRNA3, edm2c_gRNA1, edm2c_gRNA2, edm2c_gRNA3, IBM2_gRNA1, IBM2_gRNA2, IBM2_gRNA3	1249_REP_seq6	TCGTCTCAAAGAATAGACTGGTTTTAGAGCTAGAAATAGC	PCR rxn 7	Cermak et al. protocol pMOD_B assembly
Setaria viridis	pTW182	edm2a_gRNA3, edm2b_gRNA1, edm2b_gRNA2, edm2b_gRNA3, edm2c_gRNA1, edm2c_gRNA2, edm2c_gRNA3, IBM2_gRNA1, IBM2_gRNA2, IBM2_gRNA3	1250_TRNA_seq7	TCGTCTCCGATAGCACAAACTGCACCAGCCGGGAATCG	PCR rxn 7	Cermak et al. protocol pMOD_B assembly
Setaria viridis	pTW182	edm2a_gRNA3, edm2b_gRNA1, edm2b_gRNA2, edm2b_gRNA3, edm2c_gRNA1, edm2c_gRNA2, edm2c_gRNA3, IBM2_gRNA1, IBM2_gRNA2, IBM2_gRNA3	1251_REP_seq7	TCGTCTCATATCTGTGACAAGTTTTAGAGCTAGAAATAGC	PCR rxn 8	Cermak et al. protocol pMOD_B assembly
Setaria viridis	pTW182	edm2a_gRNA3, edm2b_gRNA1, edm2b_gRNA2, edm2b_gRNA3, edm2c_gRNA1, edm2c_gRNA2, edm2c_gRNA3, IBM2_gRNA1, IBM2_gRNA2, IBM2_gRNA3	1252_TRNA_seq8	TCGTCTCCATCTTTGATGTATGCACCAGCCGGGAATCG	PCR rxn 8	Cermak et al. protocol pMOD_B assembly
Setaria viridis	pTW182	edm2a_gRNA3, edm2b_gRNA1, edm2b_gRNA2, edm2b_gRNA3, edm2c_gRNA1, edm2c_gRNA2, edm2c_gRNA3, IBM2_gRNA1, IBM2_gRNA2, IBM2_gRNA3	1253_REP_seq8	TCGTCTCAAGATAGCCAGTGGTTTTAGAGCTAGAAATAGC	PCR rxn 9	Cermak et al. protocol pMOD_B assembly
Setaria viridis	pTW182	edm2a_gRNA3, edm2b_gRNA1, edm2b_gRNA2, edm2b_gRNA3, edm2c_gRNA1, edm2c_gRNA2, edm2c_gRNA3, IBM2_gRNA1, IBM2_gRNA2, IBM2_gRNA3	1254_TRNA_seq9	TCGTCTCCGCATTCTGTGACTGCACCAGCCGGGAATCG	PCR rxn 9	Cermak et al. protocol pMOD_B assembly
Setaria viridis	pTW182	edm2a_gRNA3, edm2b_gRNA1, edm2b_gRNA2, edm2b_gRNA3, edm2c_gRNA1, edm2c_gRNA2, edm2c_gRNA3, IBM2_gRNA1, IBM2_gRNA2, IBM2_gRNA3	1255_REP_seq9	TCGTCTCAATGCTCACACTGGTTTTAGAGCTAGAAATAGC	PCR rxn 10	Cermak et al. protocol pMOD_B assembly
Setaria viridis	pTW182	edm2a_gRNA3, edm2b_gRNA1, edm2b_gRNA2, edm2b_gRNA3, edm2c_gRNA1, edm2c_gRNA2, edm2c_gRNA3, IBM2_gRNA1, IBM2_gRNA2, IBM2_gRNA3	1256_TRNA_seq10	TCGTCTCCCTAACATCAAACTGCACCAGCCGGGAATCG	PCR rxn 10	Cermak et al. protocol pMOD_B assembly
Setaria viridis	pTW182	edm2a_gRNA3, edm2b_gRNA1, edm2b_gRNA2, edm2b_gRNA3, edm2c_gRNA1, edm2c_gRNA2, edm2c_gRNA3, IBM2_gRNA1, IBM2_gRNA2, IBM2_gRNA3	1257_REP_seq10	TCGTCTCATTAGACCCTCAGGTTTTAGAGCTAGAAATAGC	PCR rxn 11	Cermak et al. protocol pMOD_B assembly
Setaria viridis	pTW182	edm2a_gRNA3, edm2b_gRNA1, edm2b_gRNA2, edm2b_gRNA3, edm2c_gRNA1, edm2c_gRNA2, edm2c_gRNA3, IBM2_gRNA1, IBM2_gRNA2, IBM2_gRNA3	1258_TRNA_seq11	TCGTCTCCTTACACTGAAAGTGCACCAGCCGGGAATCG	PCR rxn 11	Cermak et al. protocol pMOD_B assembly
Setaria viridis	pTW182	edm2a_gRNA3, edm2b_gRNA1, edm2b_gRNA2, edm2b_gRNA3, edm2c_gRNA1, edm2c_gRNA2, edm2c_gRNA3, IBM2_gRNA1, IBM2_gRNA2, IBM2_gRNA3	1259_REP_seq11	TCGTCTCAGTAAAGGCCTAGGTTTTAGAGCTAGAAATAGC	PCR rxn 12	Cermak et al. protocol pMOD_B assembly
Setaria viridis	pTW182	edm2a_gRNA3, edm2b_gRNA1, edm2b_gRNA2, edm2b_gRNA3, edm2c_gRNA1, edm2c_gRNA2, edm2c_gRNA3, IBM2_gRNA1, IBM2_gRNA2, IBM2_gRNA3	1260_TRNA_seq12	TCGTCTCCGATGTCCTCTAATGCACCAGCCGGGAATCG	PCR rxn 12	Cermak et al. protocol pMOD_B assembly
Setaria viridis	pTW182	edm2a_gRNA3, edm2b_gRNA1, edm2b_gRNA2, edm2b_gRNA3, edm2c_gRNA1, edm2c_gRNA2, edm2c_gRNA3, IBM2_gRNA1, IBM2_gRNA2, IBM2_gRNA3	1261_REP_seq12	TCGTCTCACATCACTGAGAGGTTTTAGAGCTAGAAATAGC	PCR rxn 13	Cermak et al. protocol pMOD_B assembly
Setaria viridis	pTW182	edm2a_gRNA3, edm2b_gRNA1, edm2b_gRNA2, edm2b_gRNA3, edm2c_gRNA1, edm2c_gRNA2, edm2c_gRNA3, IBM2_gRNA1, IBM2_gRNA2, IBM2_gRNA3	35_TRNA_term	TGCTCTTCTGACTGCACCAGCCGGGAATCG	PCR RXN 13	Cermak et al. protocol pMOD_B assembly
Setaria viridis	pTW180	HSFB2b_gRNA3	33_oCmYLCV	TGCTCTTCGCGCTGGCAGACATACTGTCCCAC	PCR RXN 1	Cermak et al. protocol pMOD_B assembly
Setaria viridis	pTW180	HSFB2b_gRNA3	1226_TRNA_seq1	TCGTCTCCGCCCGTGGGCTCTGCACCAGCCGGGAATCG	PCR rxn 1	Cermak et al. protocol pMOD_B assembly
Setaria viridis	pTW180	HSFB2b_gRNA3	1227_REP_seq1	TCGTCTCAGGGCAGCGCTATGTTTTAGAGCTAGAAATAGC	PCR rxn 2	Cermak et al. protocol pMOD_B assembly
Setaria viridis	pTW180	HSFB2b_gRNA3	1228_TRNA_seq2	TCGTCTCCTCGATCTAATGCTGCACCAGCCGGGAATCG	PCR rxn 2	Cermak et al. protocol pMOD_B assembly
Setaria viridis	pTW180	HSFB2b_gRNA3	1229_REP_seq2	TCGTCTCATCGAGGATCGCGGTTTTAGAGCTAGAAATAGC	PCR rxn 3	Cermak et al. protocol pMOD_B assembly
Setaria viridis	pTW180	HSFB2b_gRNA3	1230_TRNA_seq3	TCGTCTCCCGCTATCGGGATTGCACCAGCCGGGAATCG	PCR rxn 3	Cermak et al. protocol pMOD_B assembly
Setaria viridis	pTW180	HSFB2b_gRNA3	1231_REP_seq3	TCGTCTCAAGCGCTGCCCGTGTTTTAGAGCTAGAAATAGC	PCR rxn 4	Cermak et al. protocol pMOD_B assembly
Setaria viridis	pTW180	HSFB2b_gRNA3	1232_TRNA_seq4	TCGTCTCCTGCTCCGGCGAGTGCACCAGCCGGGAATCG	PCR rxn 4	Cermak et al. protocol pMOD_B assembly
Setaria viridis	pTW180	HSFB2b_gRNA3	1233_REP_seq4	TCGTCTCAAGCAGTTGACTAGTTTTAGAGCTAGAAATAGC	PCR rxn 5	Cermak et al. protocol pMOD_B assembly
Setaria viridis	pTW180	HSFB2b_gRNA3	1234_TRNA_seq5	TCGTCTCCCTGCAACGGGTCTGCACCAGCCGGGAATCG	PCR rxn 5	Cermak et al. protocol
Setaria viridis	pTW180	HSFB2b_gRNA3	1235_REP_seq5	TCGTCTCAGCAGGCTCGGAGGTTTTAGAGCTAGAAATAGC	PCR rxn 6	Cermak et al. protocol
Setaria viridis	pTW180	HSFB2b_gRNA3	1236_TRNA_seq6	TCGTCTCCAGTACGCCTCCTTGCACCAGCCGGGAATCG	PCR rxn 6	Cermak et al. protocol
Setaria viridis	pTW180	HSFB2b_gRNA3	1237_REP_seq6	TCGTCTCATACTTGGTCATGGTTTTAGAGCTAGAAATAGC	PCR rxn 7	Cermak et al. protocol
Setaria viridis	pTW180	HSFB2b_gRNA3	35_TRNA_term	TGCTCTTCTGACTGCACCAGCCGGGAATCG	PCR RXN 7	Cermak et al. protocol
Setaria viridis	pTW181	hsfa6a1_gRNA2	33_oCmYLCV	TGCTCTTCGCGCTGGCAGACATACTGTCCCAC	PCR RXN 1	Cermak et al. protocol
Setaria viridis	pTW181	hsfa6a1_gRNA2	1182_TRNA_seq1	TCGTCTCCATGATATGGTACTGCACCAGCCGGGAATCG	PCR rxn 1	Cermak et al. protocol
Setaria viridis	pTW181	hsfa6a1_gRNA2	1183_REP_seq1	TCGTCTCATCATGTCCGTGGGTTTTAGAGCTAGAAATAGC	PCR rxn 2	Cermak et al. protocol
Setaria viridis	pTW181	hsfa6a1_gRNA2	1184_TRNA_seq2	TCGTCTCCACTAGCCGTCTTTGCACCAGCCGGGAATCG	PCR rxn 2	Cermak et al. protocol
Setaria viridis	pTW181	hsfa6a1_gRNA2	1185_REP_seq2	TCGTCTCATAGTATCGCGACGTTTTAGAGCTAGAAATAGC	PCR rxn 3	Cermak et al. protocol
Setaria viridis	pTW181	hsfa6a1_gRNA2	1186_TRNA_seq3	TCGTCTCCGACGGTCAAGCATGCACCAGCCGGGAATCG	PCR rxn 3	Cermak et al. protocol
Setaria viridis	pTW181	hsfa6a1_gRNA2	1187_REP_seq3	TCGTCTCACGTCACGGCGGTGTTTTAGAGCTAGAAATAGC	PCR rxn 4	Cermak et al. protocol
Setaria viridis	pTW181	hsfa6a1_gRNA2	1188_TRNA_seq4	TCGTCTCCGGATACAAGGCGTGCACCAGCCGGGAATCG	PCR rxn 4	Cermak et al. protocol
Setaria viridis	pTW181	hsfa6a1_gRNA2	1189_REP_seq4	TCGTCTCAATCCGACTCCCGGTTTTAGAGCTAGAAATAGC	PCR rxn 5	Cermak et al. protocol
Setaria viridis	pTW181	hsfa6a1_gRNA2	1190_TRNA_seq5	TCGTCTCCTCGTACCATATCTGCACCAGCCGGGAATCG	PCR rxn 5	Cermak et al. protocol
Setaria viridis	pTW181	hsfa6a1_gRNA2	1191_REP_seq5	TCGTCTCAACGAGCTGCTCGGTTTTAGAGCTAGAAATAGC	PCR rxn 6	Cermak et al. protocol
Setaria viridis	pTW181	hsfa6a1_gRNA2	1192_TRNA_seq6	TCGTCTCCTATGGAACGAGCTGCACCAGCCGGGAATCG	PCR rxn 6	Cermak et al. protocol
Setaria viridis	pTW181	hsfa6a1_gRNA2	1193_REP_seq6	TCGTCTCACATACCATGTCCGTTTTAGAGCTAGAAATAGC	PCR rxn 7	Cermak et al. protocol
Setaria viridis	pTW181	hsfa6a1_gRNA2	35_TRNA_term	TGCTCTTCTGACTGCACCAGCCGGGAATCG	PCR RXN 7	Cermak et al. protocol
Setaria viridis	pTW091	CMT2_gRNA1, CMT3a_gRNA1, CMT3a_gRNA2, CMT3b_gRNA1	33_oCmYLCV	TGCTCTTCGCGCTGGCAGACATACTGTCCCAC	PCR RXN 1	Cermak et al. protocol
Arabidopsis thaliana	pTW317	FWA gRNA 51	113_o35s_prom	TGCTCTTCGCGCATGGAGTCAAAGATTCAA	FWA_plasmid_2_RXN_1	Cermak et al. protocol pMOD_B2301. B2301 was assembled with pMOD_A0101, pMZ105 and TRNAS230d for T-DNA final assembly
Arabidopsis thaliana	pTW317	FWA gRNA 51	1654_TRNA_seq1	TCGTCTCCTTATGAATGTCGTGCACCAGCCGGGAATCG	FWA_plasmid_2_RXN_1	Cermak et al. protocol pMOD_B2301.B2301 was assembled with pMOD_A0101, pMZ105 and TRNAS230d for T-DNA final assembly
Arabidopsis thaliana	pTW317	FWA gRNA 51	1655_REP_seq1	TCGTCTCAATAACAGAGACAGTTTTAGAGCTAGAAATAGC	FWA_plasmid_2_RXN_2	Cermak et al. protocol pMOD_B2301.B2301 was assembled with pMOD_A0101, pMZ105 and TRNAS230d for T-DNA final assembly
Arabidopsis thaliana	pTW317	FWA gRNA 51	1656_TRNA_seq2	TCGTCTCCTGCTCGTATGAATGCACCAGCCGGGAATCG	FWA_plasmid_2_RXN_2	Cermak et al. protocol pMOD_B2301.B2301 was assembled with pMOD_A0101, pMZ105 and TRNAS230d for T-DNA final assembly
Arabidopsis thaliana	pTW317	FWA gRNA 51	1657_REP_seq2	TCGTCTCAAGCACCGCTTTAGTTTTAGAGCTAGAAATAGC	FWA_plasmid_2_RXN_3	Cermak et al. protocol pMOD_B2301.B2301 was assembled with pMOD_A0101, pMZ105 and TRNAS230d for T-DNA final assembly
Arabidopsis thaliana	pTW317	FWA gRNA 51	1658_TRNA_seq3	TCGTCTCCATGGTCAGTACATGCACCAGCCGGGAATCG	FWA_plasmid_2_RXN_3	Cermak et al. protocol pMOD_B2301.B2301 was assembled with pMOD_A0101, pMZ105 and TRNAS230d for T-DNA final assembly
Arabidopsis thaliana	pTW317	FWA gRNA 51	1659_REP_seq3	TCGTCTCACCATCCTTTGTTGTTTTAGAGCTAGAAATAGC	FWA_plasmid_2_RXN_4	Cermak et al. protocol pMOD_B2301.B2301 was assembled with pMOD_A0101, pMZ105 and TRNAS230d for T-DNA final assembly
Arabidopsis thaliana	pTW317	FWA gRNA 51	1660_TRNA_seq4	TCGTCTCCTCTTCTGGATTATGCACCAGCCGGGAATCG	FWA_plasmid_2_RXN_4	Cermak et al. protocol pMOD_B2301.B2301 was assembled with pMOD_A0101, pMZ105 and TRNAS230d for T-DNA final assembly
Arabidopsis thaliana	pTW317	FWA gRNA 51	1661_REP_seq4	TCGTCTCAAAGAGTCTTGGTGTTTTAGAGCTAGAAATAGC	FWA_plasmid_2_RXN_5	Cermak et al. protocol pMOD_B2301.B2301 was assembled with pMOD_A0101, pMZ105 and TRNAS230d for T-DNA final assembly
Arabidopsis thaliana	pTW317	FWA gRNA 51	35_TRNA_term	TGCTCTTCTGACTGCACCAGCCGGGAATCG	FWA_plasmid_2_RXN_5	Cermak et al. protocol pMOD_B2301.B2301 was assembled with pMOD_A0101, pMZ105 and TRNAS230d for T-DNA final assembly
Arabidopsis thaliana	pTW318	FWA gRNA 9, FWA gRNA 50	113_o35s_prom	TGCTCTTCGCGCATGGAGTCAAAGATTCAA	FWA_plasmid_3_RXN_1	Cermak et al. protocol pMOD_B2301.B2301 was assembled with pMOD_A0101, pMZ105 and TRNAS230d for T-DNA final assembly
Arabidopsis thaliana	pTW318	FWA gRNA 9, FWA gRNA 50	1662_TRNA_seq1	TCGTCTCCTTATGAATGTCGTGCACCAGCCGGGAATCG	FWA_plasmid_3_RXN_1	Cermak et al. protocol pMOD_B2301.B2301 was assembled with pMOD_A0101, pMZ105 and TRNAS230d for T-DNA final assembly
Arabidopsis thaliana	pTW318	FWA gRNA 9, FWA gRNA 50	1663_REP_seq1	TCGTCTCAATAACAGAGACAGTTTTAGAGCTAGAAATAGC	FWA_plasmid_3_RXN_2	Cermak et al. protocol pMOD_B2301.B2301 was assembled with pMOD_A0101, pMZ105 and TRNAS230d for T-DNA final assembly
Arabidopsis thaliana	pTW318	FWA gRNA 9, FWA gRNA 50	1664_TRNA_seq2	TCGTCTCCACCTGGTTTTGGTGCACCAGCCGGGAATCG	FWA_plasmid_3_RXN_2	Cermak et al. protocol pMOD_B2301.B2301 was assembled with pMOD_A0101, pMZ105 and TRNAS230d for T-DNA final assembly
Arabidopsis thaliana	pTW318	FWA gRNA 9, FWA gRNA 50	1665_REP_seq2	TCGTCTCAAGGTGAAGCTGAGTTTTAGAGCTAGAAATAGC	FWA_plasmid_3_RXN_3	Cermak et al. protocol pMOD_B2301.B2301 was assembled with pMOD_A0101, pMZ105 and TRNAS230d for T-DNA final assembly
Arabidopsis thaliana	pTW318	FWA gRNA 9, FWA gRNA 50	1666_TRNA_seq3	TCGTCTCCAATTGTGGAGGCTGCACCAGCCGGGAATCG	FWA_plasmid_3_RXN_3	Cermak et al. protocol pMOD_B2301.B2301 was assembled with pMOD_A0101, pMZ105 and TRNAS230d for T-DNA final assembly
Arabidopsis thaliana	pTW318	FWA gRNA 9, FWA gRNA 50	1667_REP_seq3	TCGTCTCAAATTTGCCCGGGGTTTTAGAGCTAGAAATAGC	FWA_plasmid_3_RXN_4	Cermak et al. protocol pMOD_B2301.B2301 was assembled with pMOD_A0101, pMZ105 and TRNAS230d for T-DNA final assembly
Arabidopsis thaliana	pTW318	FWA gRNA 9, FWA gRNA 50	1668_TRNA_seq4	TCGTCTCCTTGGTTGGAAAATGCACCAGCCGGGAATCG	FWA_plasmid_3_RXN_4	Cermak et al. protocol pMOD_B2301.B2301 was assembled with pMOD_A0101, pMZ105 and TRNAS230d for T-DNA final assembly
Arabidopsis thaliana	pTW318	FWA gRNA 9, FWA gRNA 50	1669_REP_seq4	TCGTCTCACCAAGACTCTTCGTTTTAGAGCTAGAAATAGC	FWA_plasmid_3_RXN_5	Cermak et al. protocol pMOD_B2301.B2301 was assembled with pMOD_A0101, pMZ105 and TRNAS230d for T-DNA final assembly
Arabidopsis thaliana	pTW318	FWA gRNA 9, FWA gRNA 50	35_TRNA_term	TGCTCTTCTGACTGCACCAGCCGGGAATCG	FWA_plasmid_3_RXN_5	Cermak et al. protocol pMOD_B2301.B2301 was assembled with pMOD_A0101, pMZ105 and TRNAS230d for T-DNA final assembly
Arabidopsis thaliana	pTW319	FWA gRNA 8, FWA gRNA 26	113_o35s_prom	TGCTCTTCGCGCATGGAGTCAAAGATTCAA	FWA_plasmid_4_RXN_1	Cermak et al. protocol pMOD_B2301.B2301 was assembled with pMOD_A0101, pMZ105 and TRNAS230d for T-DNA final assembly
Arabidopsis thaliana	pTW319	FWA gRNA 8, FWA gRNA 26	1670_TRNA_seq1	TCGTCTCCTTATGAATGTCGTGCACCAGCCGGGAATCG	FWA_plasmid_4_RXN_1	Cermak et al. protocol pMOD_B2301.B2301 was assembled with pMOD_A0101, pMZ105 and TRNAS230d for T-DNA final assembly
Arabidopsis thaliana	pTW319	FWA gRNA 8, FWA gRNA 26	1671_REP_seq1	TCGTCTCAATAACAGAGACAGTTTTAGAGCTAGAAATAGC	FWA_plasmid_4_RXN_2	Cermak et al. protocol pMOD_B2301.B2301 was assembled with pMOD_A0101, pMZ105 and TRNAS230d for T-DNA final assembly
Arabidopsis thaliana	pTW319	FWA gRNA 8, FWA gRNA 26	1672_TRNA_seq2	TCGTCTCCTGAAGCTGAAGGTGCACCAGCCGGGAATCG	FWA_plasmid_4_RXN_2	Cermak et al. protocol pMOD_B2301.B2301 was assembled with pMOD_A0101, pMZ105 and TRNAS230d for T-DNA final assembly
Arabidopsis thaliana	pTW319	FWA gRNA 8, FWA gRNA 26	1673_REP_seq2	TCGTCTCATTCACCTGGTTTGTTTTAGAGCTAGAAATAGC	FWA_plasmid_4_RXN_3	Cermak et al. protocol pMOD_B2301.B2301 was assembled with pMOD_A0101, pMZ105 and TRNAS230d for T-DNA final assembly
Arabidopsis thaliana	pTW319	FWA gRNA 8, FWA gRNA 26	1674_TRNA_seq3	TCGTCTCCTTGAGAGAGTTGTGCACCAGCCGGGAATCG	FWA_plasmid_4_RXN_3	Cermak et al. protocol pMOD_B2301.B2301 was assembled with pMOD_A0101, pMZ105 and TRNAS230d for T-DNA final assembly
Arabidopsis thaliana	pTW319	FWA gRNA 8, FWA gRNA 26	1675_REP_seq3	TCGTCTCATCAAAGCCGTAAGTTTTAGAGCTAGAAATAGC	FWA_plasmid_4_RXN_4	Cermak et al. protocol pMOD_B2301.B2301 was assembled with pMOD_A0101, pMZ105 and TRNAS230d for T-DNA final assembly
Arabidopsis thaliana	pTW319	FWA gRNA 8, FWA gRNA 26	1676_TRNA_seq4	TCGTCTCCGATGCATCATTCTGCACCAGCCGGGAATCG	FWA_plasmid_4_RXN_4	Cermak et al. protocol pMOD_B2301.B2301 was assembled with pMOD_A0101, pMZ105 and TRNAS230d for T-DNA final assembly
Arabidopsis thaliana	pTW319	FWA gRNA 8, FWA gRNA 26	1677_REP_seq4	TCGTCTCACATCAGGTGCAAGTTTTAGAGCTAGAAATAGC	FWA_plasmid_4_RXN_5	Cermak et al. protocol pMOD_B2301.B2301 was assembled with pMOD_A0101, pMZ105 and TRNAS230d for T-DNA final assembly
Arabidopsis thaliana	pTW319	FWA gRNA 8, FWA gRNA 26	35_TRNA_term	TGCTCTTCTGACTGCACCAGCCGGGAATCG	FWA_plasmid_4_RXN_5	Cermak et al. protocol pMOD_B2301.B2301 was assembled with pMOD_A0101, pMZ105 and TRNAS230d for T-DNA final assembly
Arabidopsis thaliana	pTW320	FWA gRNA 41, FWA gRNA 16	113_o35s_prom	TGCTCTTCGCGCATGGAGTCAAAGATTCAA	FWA_plasmid_5_RXN_1	Cermak et al. protocol pMOD_B2301.B2301 was assembled with pMOD_A0101, pMZ105 and TRNAS230d for T-DNA final assembly
Arabidopsis thaliana	pTW320	FWA gRNA 41, FWA gRNA 16	1678_TRNA_seq1	TCGTCTCCTTATGAATGTCGTGCACCAGCCGGGAATCG	FWA_plasmid_5_RXN_1	Cermak et al. protocol pMOD_B2301.B2301 was assembled with pMOD_A0101, pMZ105 and TRNAS230d for T-DNA final assembly
Arabidopsis thaliana	pTW320	FWA gRNA 41, FWA gRNA 16	1679_REP_seq1	TCGTCTCAATAACAGAGACAGTTTTAGAGCTAGAAATAGC	FWA_plasmid_5_RXN_2	Cermak et al. protocol pMOD_B2301.B2301 was assembled with pMOD_A0101, pMZ105 and TRNAS230d for T-DNA final assembly
Arabidopsis thaliana	pTW320	FWA gRNA 41, FWA gRNA 16	1680_TRNA_seq2	TCGTCTCCTATACACTTCTGTGCACCAGCCGGGAATCG	FWA_plasmid_5_RXN_2	Cermak et al. protocol pMOD_B2301.B2301 was assembled with pMOD_A0101, pMZ105 and TRNAS230d for T-DNA final assembly
Arabidopsis thaliana	pTW320	FWA gRNA 41, FWA gRNA 16	1681_REP_seq2	TCGTCTCATATACATGCATGGTTTTAGAGCTAGAAATAGC	FWA_plasmid_5_RXN_3	Cermak et al. protocol pMOD_B2301.B2301 was assembled with pMOD_A0101, pMZ105 and TRNAS230d for T-DNA final assembly
Arabidopsis thaliana	pTW320	FWA gRNA 41, FWA gRNA 16	1682_TRNA_seq3	TCGTCTCCGGACAGGCCTTGTGCACCAGCCGGGAATCG	FWA_plasmid_5_RXN_3	Cermak et al. protocol pMOD_B2301.B2301 was assembled with pMOD_A0101, pMZ105 and TRNAS230d for T-DNA final assembly
Arabidopsis thaliana	pTW320	FWA gRNA 41, FWA gRNA 16	1683_REP_seq3	TCGTCTCAGTCCAAATTTAGGTTTTAGAGCTAGAAATAGC	FWA_plasmid_5_RXN_4	Cermak et al. protocol pMOD_B2301.B2301 was assembled with pMOD_A0101, pMZ105 and TRNAS230d for T-DNA final assembly
Arabidopsis thaliana	pTW320	FWA gRNA 41, FWA gRNA 16	35_TRNA_term	TGCTCTTCTGACTGCACCAGCCGGGAATCG	FWA_plasmid_5_RXN_4	Cermak et al. protocol pMOD_B2301.B2301 was assembled with pMOD_A0101, pMZ105 and TRNAS230d for T-DNA final assembly
Arabidopsis thaliana	pTW321	FWA gRNA 39, FWA gRNA 18	113_o35s_prom	TGCTCTTCGCGCATGGAGTCAAAGATTCAA	FWA_plasmid_6_RXN_1	Cermak et al. protocol pMOD_B2301.B2301 was assembled with pMOD_A0101, pMZ105 and TRNAS230d for T-DNA final assembly
Arabidopsis thaliana	pTW321	FWA gRNA 39, FWA gRNA 18	1684_TRNA_seq1	TCGTCTCCTTATGAATGTCGTGCACCAGCCGGGAATCG	FWA_plasmid_6_RXN_1	Cermak et al. protocol pMOD_B2301.B2301 was assembled with pMOD_A0101, pMZ105 and TRNAS230d for T-DNA final assembly
Arabidopsis thaliana	pTW321	FWA gRNA 39, FWA gRNA 18	1685_REP_seq1	TCGTCTCAATAACAGAGACAGTTTTAGAGCTAGAAATAGC	FWA_plasmid_6_RXN_2	Cermak et al. protocol pMOD_B2301.B2301 was assembled with pMOD_A0101, pMZ105 and TRNAS230d for T-DNA final assembly
Arabidopsis thaliana	pTW321	FWA gRNA 39, FWA gRNA 18	1686_TRNA_seq2	TCGTCTCCTCTCATCCTCAATGCACCAGCCGGGAATCG	FWA_plasmid_6_RXN_2	Cermak et al. protocol pMOD_B2301.B2301 was assembled with pMOD_A0101, pMZ105 and TRNAS230d for T-DNA final assembly
Arabidopsis thaliana	pTW321	FWA gRNA 39, FWA gRNA 18	1687_REP_seq2	TCGTCTCAGAGAGAGAGAGGGTTTTAGAGCTAGAAATAGC	FWA_plasmid_6_RXN_3	Cermak et al. protocol pMOD_B2301.B2301 was assembled with pMOD_A0101, pMZ105 and TRNAS230d for T-DNA final assembly
Arabidopsis thaliana	pTW321	FWA gRNA 39, FWA gRNA 18	1688_TRNA_seq3	TCGTCTCCGGAGAACCGAAATGCACCAGCCGGGAATCG	FWA_plasmid_6_RXN_3	Cermak et al. protocol pMOD_B2301.B2301 was assembled with pMOD_A0101, pMZ105 and TRNAS230d for T-DNA final assembly
Arabidopsis thaliana	pTW321	FWA gRNA 39, FWA gRNA 18	1689_REP_seq3	TCGTCTCACTCCACTAAATTGTTTTAGAGCTAGAAATAGC	FWA_plasmid_6_RXN_4	Cermak et al. protocol pMOD_B2301.B2301 was assembled with pMOD_A0101, pMZ105 and TRNAS230d for T-DNA final assembly
Arabidopsis thaliana	pTW321	FWA gRNA 39, FWA gRNA 18	35_TRNA_term	TGCTCTTCTGACTGCACCAGCCGGGAATCG	FWA_plasmid_6_RXN_4	Cermak et al. protocol pMOD_B2301.B2301 was assembled with pMOD_A0101, pMZ105 and TRNAS230d for T-DNA final assembly
Arabidopsis thaliana	pTW322	FWA gRNA 17	113_o35s_prom	TGCTCTTCGCGCATGGAGTCAAAGATTCAA	FWA_plasmid_7_RXN_1	Cermak et al. protocol pMOD_B2301.B2301 was assembled with pMOD_A0101, pMZ105 and TRNAS230d for T-DNA final assembly
Arabidopsis thaliana	pTW322	FWA gRNA 17	1690_TRNA_seq1	TCGTCTCCTTATGAATGTCGTGCACCAGCCGGGAATCG	FWA_plasmid_7_RXN_1	Cermak et al. protocol pMOD_B2301.B2301 was assembled with pMOD_A0101, pMZ105 and TRNAS230d for T-DNA final assembly
Arabidopsis thaliana	pTW322	FWA gRNA 17	1691_REP_seq1	TCGTCTCAATAACAGAGACAGTTTTAGAGCTAGAAATAGC	FWA_plasmid_7_RXN_2	Cermak et al. protocol pMOD_B2301.B2301 was assembled with pMOD_A0101, pMZ105 and TRNAS230d for T-DNA final assembly
Arabidopsis thaliana	pTW322	FWA gRNA 17	1692_TRNA_seq2	TCGTCTCCTACGTGCAAAGATGCACCAGCCGGGAATCG	FWA_plasmid_7_RXN_2	Cermak et al. protocol pMOD_B2301.B2301 was assembled with pMOD_A0101, pMZ105 and TRNAS230d for T-DNA final assembly
Arabidopsis thaliana	pTW322	FWA gRNA 17	1693_REP_seq2	TCGTCTCACGTACCGTATTAGTTTTAGAGCTAGAAATAGC	FWA_plasmid_7_RXN_3	Cermak et al. protocol pMOD_B2301.B2301 was assembled with pMOD_A0101, pMZ105 and TRNAS230d for T-DNA final assembly
Arabidopsis thaliana	pTW322	FWA gRNA 17	1694_TRNA_seq3	TCGTCTCCTTAGTGGAGAACTGCACCAGCCGGGAATCG	FWA_plasmid_7_RXN_3	Cermak et al. protocol pMOD_B2301.B2301 was assembled with pMOD_A0101, pMZ105 and TRNAS230d for T-DNA final assembly
Arabidopsis thaliana	pTW322	FWA gRNA 17	1695_REP_seq3	TCGTCTCACTAAATTTGGACGTTTTAGAGCTAGAAATAGC	FWA_plasmid_7_RXN_4	Cermak et al. protocol pMOD_B2301.B2301 was assembled with pMOD_A0101, pMZ105 and TRNAS230d for T-DNA final assembly
Arabidopsis thaliana	pTW322	FWA gRNA 17	35_TRNA_term	TGCTCTTCTGACTGCACCAGCCGGGAATCG	FWA_plasmid_7_RXN_4	Cermak et al. protocol pMOD_B2301.B2301 was assembled with pMOD_A0101, pMZ105 and TRNAS230d for T-DNA final assembly
Setaria viridis	pTW091	CMT2_gRNA1, CMT3a_gRNA1, CMT3a_gRNA2, CMT3b_gRNA1	33_oCmYLCV	TGCTCTTCGCGCTGGCAGACATACTGTCCCAC	ModB_2303_PCR 1	Cermak et al. protocol pMOD_B assembly
Setaria viridis	pTW091	CMT2_gRNA1, CMT3a_gRNA1, CMT3a_gRNA2, CMT3b_gRNA1	414_TRNA_seq1	TCGTCTCCCATATCTTGCAATGCACCAGCCGGGAATCG	ModB_2303_PCR 1	Cermak et al. protocol pMOD_B assembly
Setaria viridis	pTW091	CMT2_gRNA1, CMT3a_gRNA1, CMT3a_gRNA2, CMT3b_gRNA1	415_REP_seq1	TCGTCTCATATGCTCTAAGCGTTTTAGAGCTAGAAATAGC	ModB_2303_PCR 2	Cermak et al. protocol pMOD_B assembly
Setaria viridis	pTW091	CMT2_gRNA1, CMT3a_gRNA1, CMT3a_gRNA2, CMT3b_gRNA1	416_TRNA_seq2	TCGTCTCCCGAACCCACATCTGCACCAGCCGGGAATCG	ModB_2303_PCR 2	Cermak et al. protocol pMOD_B assembly
Setaria viridis	pTW091	CMT2_gRNA1, CMT3a_gRNA1, CMT3a_gRNA2, CMT3b_gRNA1	417_REP_seq2	TCGTCTCATTCGGATTCAGCGTTTTAGAGCTAGAAATAGC	ModB_2303_PCR 3	Cermak et al. protocol pMOD_B assembly
Setaria viridis	pTW091	CMT2_gRNA1, CMT3a_gRNA1, CMT3a_gRNA2, CMT3b_gRNA1	418_TRNA_seq3	TCGTCTCCAGTGGGATGCACTGCACCAGCCGGGAATCG	ModB_2303_PCR 3	Cermak et al. protocol pMOD_B assembly
Setaria viridis	pTW091	CMT2_gRNA1, CMT3a_gRNA1, CMT3a_gRNA2, CMT3b_gRNA1	419_REP_seq3	TCGTCTCACACTCCTTAAGGGTTTTAGAGCTAGAAATAGC	ModB_2303_PCR 4	Cermak et al. protocol pMOD_B assembly
Setaria viridis	pTW091	CMT2_gRNA1, CMT3a_gRNA1, CMT3a_gRNA2, CMT3b_gRNA1	420_TRNA_seq1	TCGTCTCCCCCAAGACAAAGTGCACCAGCCGGGAATCG	ModB_2303_PCR 4	Cermak et al. protocol pMOD_B assembly
Setaria viridis	pTW091	CMT2_gRNA1, CMT3a_gRNA1, CMT3a_gRNA2, CMT3b_gRNA1	421_REP_seq1	TCGTCTCATGGGGCTCGTGGGTTTTAGAGCTAGAAATAGC	ModB_2303_PCR 5	Cermak et al. protocol pMOD_B assembly
Setaria viridis	pTW091	CMT2_gRNA1, CMT3a_gRNA1, CMT3a_gRNA2, CMT3b_gRNA1	422_TRNA_seq2	TCGTCTCCGTGGGTTTAACCTGCACCAGCCGGGAATCG	ModB_2303_PCR 5	Cermak et al. protocol pMOD_B assembly
Setaria viridis	pTW091	CMT2_gRNA1, CMT3a_gRNA1, CMT3a_gRNA2, CMT3b_gRNA1	423_REP_seq2	TCGTCTCACCACTTATCCCTGTTTTAGAGCTAGAAATAGC	ModB_2303_PCR 6	Cermak et al. protocol pMOD_B assembly
Setaria viridis	pTW091	CMT2_gRNA1, CMT3a_gRNA1, CMT3a_gRNA2, CMT3b_gRNA1	424_TRNA_seq3	TCGTCTCCATCCATCAGCGATGCACCAGCCGGGAATCG	ModB_2303_PCR 6	Cermak et al. protocol pMOD_B assembly
Setaria viridis	pTW091	CMT2_gRNA1, CMT3a_gRNA1, CMT3a_gRNA2, CMT3b_gRNA1	429_REP_seq6	TCGTCTCAATCCATCAGCGAGTTTTAGAGCTAGAAATAGC	ModB_2303_PCR 7	Cermak et al. protocol pMOD_B assembly
Setaria viridis	pTW091	CMT2_gRNA1, CMT3a_gRNA1, CMT3a_gRNA2, CMT3b_gRNA1	35_TRNA_term	TGCTCTTCTGACTGCACCAGCCGGGAATCG	ModB_2303_PCR 7	Cermak et al. protocol pMOD_B assembly
human	pTW224	Luciferase gRNA T	1270_Luc gRNA 3 T	CACCGaattgtcttgtccctatcga	Luc gRNA 3 T	digestion and ligation into pTW184
human	pTW224	Luciferase gRNA T	1277_Luc gRNA 3 T	AAACtcgatagggacaagacaattC	Luc gRNA 3 T	digestion and ligation into pTW184
human	pTW225	Luciferase gRNA G	1271_Luc gRNa 4 G	CACCGtgtgccagagtccttcgata	Luc gRNA 3 T	digestion and ligation into pTW184
human	pTW225	Luciferase gRNA G	1278_Luc gRNa 4 G	AAACtatcgaaggactctggcacaC	Luc gRNA 4 G	digestion and ligation into pTW184
Arabidopsis thalina and setaria viridis	pTW199	Luciferase gRNA T	113_o35s_prom	TGCTCTTCGCGCATGGAGTCAAAGATTCAA	PCR rxn 1	Cermak et al. protocol pMOD_B assembly
Arabidopsis thalina and setaria viridis	pTW199	Luciferase gRNA T	1382_TRNA_seq1	TCGTCTCCgacaagacaattTGCACCAGCCGGGAATCG	PCR rxn 1	Cermak et al. protocol pMOD_B assembly
Arabidopsis thalina and setaria viridis	pTW199	Luciferase gRNA T	1383_REP_seq1	TCGTCTCAtgtccctatcgaGTTTTAGAGCTAGAAATAGC	PCR rxn 2	Cermak et al. protocol pMOD_B assembly
Arabidopsis thalina and setaria viridis	pTW199	Luciferase gRNA T	35_TRNA_term	TGCTCTTCTGACTGCACCAGCCGGGAATCG	PCR rxn 2	Cermak et al. protocol pMOD_B assembly
Arabidopsis thalina and setaria viridis	pTW200	Luciferase gRNA G	113_o35s_prom	TGCTCTTCGCGCATGGAGTCAAAGATTCAA	PCR rxn 1	Cermak et al. protocol pMOD_B assembly
Arabidopsis thalina and setaria viridis	pTW200	Luciferase gRNA G	1384_TRNA_seq1	TCGTCTCCgactctggcacaTGCACCAGCCGGGAATCG	PCR rxn 1	Cermak et al. protocol pMOD_B assembly
Arabidopsis thalina and setaria viridis	pTW200	Luciferase gRNA G	1385_REP_seq1	TCGTCTCAagtccttcgataGTTTTAGAGCTAGAAATAGC	PCR rxn 2	Cermak et al. protocol pMOD_B assembly
Arabidopsis thalina and setaria viridis	pTW200	Luciferase gRNA G	35_TRNA_term	TGCTCTTCTGACTGCACCAGCCGGGAATCG	PCR rxn 2	Cermak et al. protocol pMOD_B assembly
	genotyping primer	Luciferase 4G	1456_LUC_gRNA3_4_F	cagcctaccgtggtgttcgt
	genotyping primer	Luciferase 4G	1457_LUC_gRNA3_4_R	taggatctctggcatgcgagaa
	genotyping primer	Luciferase 3T	1456_LUC_gRNA3_4_F	cagcctaccgtggtgttcgt
	genotyping primer	Luciferase 3T	1457_LUC_gRNA3_4_R	taggatctctggcatgcgagaa
Arabidopsis thalina	genotyping primer	CHLl2	1860_CHLl2_R	TGCCTAATACCAAAAGAACCCA
Arabidopsis thalina	genotyping primer	CHLl2	1861_CHLl2_F	TATCTGCTCATACACTTGTTGAC
Setaria viridis	genotyping primer	H2A.C	oJK23	https://doi.org/10.1093/plcell/koad139
Setaria viridis	genotyping primer	H2A.C	oJK24	https://doi.org/10.1093/plcell/koad139
Setaria viridis	genotyping primer	H2A.N	oJK21	CCGGAATCTGCTCGCACCTGAT
Setaria viridis	genotyping primer	H2A.N	oJK22	GACGGGGAACTGGAGCCCGGCCT
Setaria viridis	genotyping primer	photosystem II3	1434_JK001_F	ACTCTGCTTGACACCATGGG
Setaria viridis	genotyping primer	photosystem II3	1435_JK001_R	TTGATCTTCTTGCCGGTGCC
Setaria viridis	genotyping primer	photosystem II subunit29	1438_JK003_F	GGAGATAGCACCGGAACTCT
Setaria viridis	genotyping primer	photosystem II subunit29	1439_JK003_R	TTCTGGTCCAGCGAGTCCAG
Setaria viridis	genotyping primer	photosystem II oxygen evolving polypeptide2	1440_JK004_F	GCACACCAAACGAAGCCTCG
Setaria viridis	genotyping primer	photosystem II oxygen evolving polypeptide2	1441_JK004_R	CTGCGCCTTGCAGATGAGCT
Setaria viridis	genotyping primer	Helix-turn-helix motif, Homeobox domain, Homeobox, conserved site, Homeobox-like domain superfamily, Leucine zipper, homeobox-associated	1448_JK008_F	GATCCAGTCGGACGATGACG
Setaria viridis	genotyping primer	Helix-turn-helix motif, Homeobox domain, Homeobox, conserved site, Homeobox-like domain superfamily, Leucine zipper, homeobox-associated	1449_JK008_R	CCTACCATGCATCCATACACCT
Setaria viridis	genotyping primer	RNA polymerase sigma factor, region 2	1452_JK010_F	CAAGGAGAGCCTGGTGATCA
Setaria viridis	genotyping primer	RNA polymerase sigma factor, region 2	1453_JK010_R	TACTAGTAGGCTGTGCACCG
Arabidopsis thalina	genotyping primer	MCsite5_1	https://doi.org/10.1093/plphys/kiac285	https://doi.org/10.1093/plphys/kiac285
Arabidopsis thalina		MCsite5_1	https://doi.org/10.1093/plphys/kiac285	https://doi.org/10.1093/plphys/kiac285
Arabidopsis thalina	genotyping primer	MCsite5_8	https://doi.org/10.1093/plphys/kiac285	https://doi.org/10.1093/plphys/kiac285
Arabidopsis thalina		MCsite5_8	https://doi.org/10.1093/plphys/kiac285	https://doi.org/10.1093/plphys/kiac285
Arabidopsis thalina	genotyping primer	MCsite5_7	https://doi.org/10.1093/plphys/kiac285	https://doi.org/10.1093/plphys/kiac285
Arabidopsis thalina		MCsite5_7	https://doi.org/10.1093/plphys/kiac285	https://doi.org/10.1093/plphys/kiac285
Arabidopsis thalina	genotyping primer	MCsite5_6	https://doi.org/10.1093/plphys/kiac285	https://doi.org/10.1093/plphys/kiac285
Arabidopsis thalina		MCsite5_6	https://doi.org/10.1093/plphys/kiac285	https://doi.org/10.1093/plphys/kiac285
Arabidopsis thalina	genotyping primer	MCsite5_5	https://doi.org/10.1093/plphys/kiac285	https://doi.org/10.1093/plphys/kiac285
Arabidopsis thalina		MCsite5_5	https://doi.org/10.1093/plphys/kiac285	https://doi.org/10.1093/plphys/kiac285
Arabidopsis thalina	genotyping primer	MCsite5_4	https://doi.org/10.1093/plphys/kiac285	https://doi.org/10.1093/plphys/kiac285
Arabidopsis thalina		MCsite5_4	https://doi.org/10.1093/plphys/kiac285	https://doi.org/10.1093/plphys/kiac285
Arabidopsis thalina	genotyping primer	MCsite5_3	https://doi.org/10.1093/plphys/kiac285	https://doi.org/10.1093/plphys/kiac285
Arabidopsis thalina		MCsite5_3	https://doi.org/10.1093/plphys/kiac285	https://doi.org/10.1093/plphys/kiac285
Arabidopsis thalina	genotyping primer	MCsite4_9	https://doi.org/10.1093/plphys/kiac285	https://doi.org/10.1093/plphys/kiac285
Arabidopsis thalina		MCsite4_9	https://doi.org/10.1093/plphys/kiac285	https://doi.org/10.1093/plphys/kiac285
Arabidopsis thalina	genotyping primer	MCsite4_8	https://doi.org/10.1093/plphys/kiac285	https://doi.org/10.1093/plphys/kiac285
Arabidopsis thalina		MCsite4_8	https://doi.org/10.1093/plphys/kiac285	https://doi.org/10.1093/plphys/kiac285
Arabidopsis thalina	genotyping primer	MCsite4_7	https://doi.org/10.1093/plphys/kiac285	https://doi.org/10.1093/plphys/kiac285
Arabidopsis thalina		MCsite4_7	https://doi.org/10.1093/plphys/kiac285	https://doi.org/10.1093/plphys/kiac285
Arabidopsis thalina	genotyping primer	MCsite4_5	https://doi.org/10.1093/plphys/kiac285	https://doi.org/10.1093/plphys/kiac285
Arabidopsis thalina		MCsite4_5	https://doi.org/10.1093/plphys/kiac285	https://doi.org/10.1093/plphys/kiac285
Arabidopsis thalina	genotyping primer	MCsite4_4	https://doi.org/10.1093/plphys/kiac285	https://doi.org/10.1093/plphys/kiac285
Arabidopsis thalina		MCsite4_4	https://doi.org/10.1093/plphys/kiac285	https://doi.org/10.1093/plphys/kiac285
Arabidopsis thalina	genotyping primer	MCsite4_3	https://doi.org/10.1093/plphys/kiac285	https://doi.org/10.1093/plphys/kiac285
Arabidopsis thalina		MCsite4_3	https://doi.org/10.1093/plphys/kiac285	https://doi.org/10.1093/plphys/kiac285
Arabidopsis thalina	genotyping primer	MCsite4_2	https://doi.org/10.1093/plphys/kiac285	https://doi.org/10.1093/plphys/kiac285
Arabidopsis thalina		MCsite4_2	https://doi.org/10.1093/plphys/kiac285	https://doi.org/10.1093/plphys/kiac285
Arabidopsis thalina	genotyping primer	MCsite4_1	https://doi.org/10.1093/plphys/kiac285	https://doi.org/10.1093/plphys/kiac285
Arabidopsis thalina		MCsite4_1	https://doi.org/10.1093/plphys/kiac285	https://doi.org/10.1093/plphys/kiac285
Arabidopsis thalina	genotyping primer	fwa_gRNA9_C	1797_FWA_2_F	CCAGGGAGCTAAACCTCTAT
Arabidopsis thalina		fwa_gRNA9_C	1798_FWA_2_R	GATGAGGATTTTCCATGTAGAAAC
Arabidopsis thalina	genotyping primer	fwa_gRNA8_G	1797_FWA_2_F	CCAGGGAGCTAAACCTCTAT
Arabidopsis thalina		fwa_gRNA8_G	1798_FWA_2_R	GATGAGGATTTTCCATGTAGAAAC
Arabidopsis thalina	genotyping primer	fwa_gRNA17_A	1799_FWA_3_F	GCACTGCTTATCAAACTCAAG
Arabidopsis thalina		fwa_gRNA17_A	1800_FWA_3_R	CAAGGTGGTCATTATTGATCTG
Arabidopsis thalina	genotyping primer	fwa_gRNA_51_T	1809_FWA_8_F	ATAGTGCCAGATGGAGTAAATG
Arabidopsis thalina		fwa_gRNA_51_T	1810_FWA_8_R	TCTGGAATGCATTTTTCACCT
Arabidopsis thalina	genotyping primer	fwa_gRNA_50_C	1809_FWA_8_F	ATAGTGCCAGATGGAGTAAATG
Arabidopsis thalina		fwa_gRNA_50_C	1810_FWA_8_R	TCTGGAATGCATTTTTCACCT
Arabidopsis thalina	genotyping primer	fwa_gRNA_41_T	1805_FWA_6_F	GAGATTTGATTTCACAGGTTACA
Arabidopsis thalina		fwa_gRNA_41_T	1806_FWA_6_R	GTTCTTTCGGATCATGAAAC
Arabidopsis thalina	genotyping primer	fwa_gRNA_39_A	1805_FWA_6_F	GAGATTTGATTTCACAGGTTACA
Arabidopsis thalina		fwa_gRNA_39_A	1806_FWA_6_R	GTTCTTTCGGATCATGAAAC
Arabidopsis thalina	genotyping primer	fwa_gRNA_26_G	1801_FWA_4_F	AATTGTGGAGACACTGAATATG
Arabidopsis thalina		fwa_gRNA_26_G	1802_FWA_4_R	AATGGGTGGTGGTTTAAAGG
Arabidopsis thalina	genotyping primer	fwa_gRNA_18_G	1799_FWA_3_F	GCACTGCTTATCAAACTCAAG
Arabidopsis thalina		fwa_gRNA_18_G	1800_FWA_3_R	CAAGGTGGTCATTATTGATCTG
Arabidopsis thalina	genotyping primer	fwa_gRNA_16_C	1799_FWA_3_F	GCACTGCTTATCAAACTCAAG
Arabidopsis thalina		fwa_gRNA_16_C	1800_FWA_3_R	CAAGGTGGTCATTATTGATCTG
Arabidopsis thalina	genotyping primer	CHL2_gRNA1	https://doi.org/10.1093/plphys/kiac285	https://doi.org/10.1093/plphys/kiac285
Arabidopsis thalina		CHL2_gRNA1	https://doi.org/10.1093/plphys/kiac285	https://doi.org/10.1093/plphys/kiac285
Setaria viridis	genotyping primer	ms45_gRNA2	https://doi.org/10.1093/plcell/koad139	https://doi.org/10.1093/plcell/koad139
Setaria viridis		ms45_gRNA2	https://doi.org/10.1093/plcell/koad139	https://doi.org/10.1093/plcell/koad139
Setaria viridis	genotyping primer	ms45_gRNA1	https://doi.org/10.1093/plcell/koad139	https://doi.org/10.1093/plcell/koad139
Setaria viridis		ms45_gRNA1	https://doi.org/10.1093/plcell/koad139	https://doi.org/10.1093/plcell/koad139
Setaria viridis	genotyping primer	ms26_gRNA8	445_svMS26_For_gRNA1	ATGGTGGAAGCTCATGCCAC
Setaria viridis		ms26_gRNA8	446_svMS26_Rev_gRNA1	GAGCAGCACATCCATGTAGGA
Setaria viridis	genotyping primer	ms26_gRNA2	https://doi.org/10.1093/plcell/koad139	https://doi.org/10.1093/plcell/koad139
Setaria viridis		ms26_gRNA2	https://doi.org/10.1093/plcell/koad139	https://doi.org/10.1093/plcell/koad139
Setaria viridis	genotyping primer	ms26_gRNA2	https://doi.org/10.1093/plcell/koad139	https://doi.org/10.1093/plcell/koad139
Setaria viridis		ms26_gRNA2	https://doi.org/10.1093/plcell/koad139	https://doi.org/10.1093/plcell/koad139
Setaria viridis	genotyping primer	MET1a_gRNA2	314_met1a_F	GGTGATCTCCATTGGGGAATTTGTA
Setaria viridis		MET1a_gRNA2	315_met1a_R	ATCTGCATTGTACAGAGCCCAG
Setaria viridis	genotyping primer	IBM2_gRNA3	1418_ibm2_gRNA3_F	CAGCAGTTAAGGAGGTGGAT
Setaria viridis		IBM2_gRNA3	1419_ibm2_gRNA3_R	GAGCATGTTTGCACTCTGGA
Setaria viridis	genotyping primer	IBM2_gRNA2	1416_ibm2_gRNA2_F	AGGTTCTTCGATGTTAACACTTG
Setaria viridis		IBM2_gRNA2	1417_ibm2_gRNA2_R	ATCCACCTCCTTAACTGCTG
Setaria viridis	genotyping primer	IBM2_gRNA1	1414_ibm2_gRNA1_F	GTGATCCAGAACCATACATCGG
Setaria viridis		IBM2_gRNA1	1415_ibm2_gRNA1_R	GCAAGTCTGTAAGTATGATGTGA
Setaria viridis	genotyping primer	HSFB2b_gRNA3	1420_hsfb2b_gRNA1_2_F	GTTCGCCAACGACTGCTTCC
Setaria viridis		HSFB2b_gRNA3	1421_hsfb2b_gRNA1_2_R	GGCGTACTTGGACATGAGGAGG
Setaria viridis	genotyping primer	edm2c_gRNA3	1412_edm2c_gRNA3_F	GATGTTTGCCAAGGCATTAAAC
Setaria viridis		edm2c_gRNA3	1413_edm2c_gRNA3_R	CTTGATAGCAGCAGGATCCT
Setaria viridis	genotyping primer	edm2c_gRNA2	1410_edm2c_gRNA2_F	ACCATCAAATGCTTCTCAAGGC
Setaria viridis		edm2c_gRNA2	1411_edm2c_gRNA2_R	GTTTAATGCCTTGGCAAACATC
Setaria viridis	genotyping primer	edm2c_gRNA1	1408c_edm2c_gRNA1_F	ACTGTTTCTGATTCATGAAGTGG
Setaria viridis		edm2c_gRNA1	1409c_edm2c_gRNA1_R	AGTTATCAGCCAATTAGTCTATGA
Setaria viridis	genotyping primer	edm2b_gRNA3	1408_edm2b_gRNA3_F	TTGCAATAACGCAACATGTGG
Setaria viridis		edm2b_gRNA3	1409_edm2b_gRNA3_R	CCCTCAGCATCATTGTCTTCAA
Setaria viridis	genotyping primer	edm2b_gRNA2	1406_edm2b_gRNA2_F	TTAGGCTGGCTCAAATGATCTG
Setaria viridis		edm2b_gRNA2	1407_edm2b_gRNA2_R	GCATTGAGCTGTTGAAGTCATA
Setaria viridis	genotyping primer	edm2b_gRNA1	1404_edm2b_gRNA1_F	GATTATGCCGTACTCCACTTGG
Setaria viridis		edm2b_gRNA1	1405_edm2b_gRNA1_R	TTGAGCAGGGCAATCCAGCT
Setaria viridis	genotyping primer	edm2a_gRNA3	1400_edm2a_gRNA3_F	CCAGAGAAGAACTTGTGGA
Setaria viridis		edm2a_gRNA3	1401_edm2a_gRNA3_R	TTAGACAGTGCTATGCTAACCAT
Setaria viridis	genotyping primer	drm1b_gRNA2	https://doi.org/10.1111/tpj.14949	https://doi.org/10.1111/tpj.14949	https://doi.org/10.1111/tpj.14949
Setaria viridis		drm1b_gRNA2	https://doi.org/10.1111/tpj.14949	https://doi.org/10.1111/tpj.14949	https://doi.org/10.1111/tpj.14949
Setaria viridis	genotyping primer	drm1b_gRNA1	https://doi.org/10.1111/tpj.14949	https://doi.org/10.1111/tpj.14949	https://doi.org/10.1111/tpj.14949
Setaria viridis		drm1b_gRNA1	https://doi.org/10.1111/tpj.14949	https://doi.org/10.1111/tpj.14949	https://doi.org/10.1111/tpj.14949
Setaria viridis	genotyping primer	drm1a_gRNA1	https://doi.org/10.1111/tpj.14949	https://doi.org/10.1111/tpj.14949	https://doi.org/10.1111/tpj.14949
Setaria viridis		drm1a_gRNA1	https://doi.org/10.1111/tpj.14949	https://doi.org/10.1111/tpj.14949	https://doi.org/10.1111/tpj.14949
Setaria viridis	genotyping primer	CMT3b_gRNA1	306_cmt3b_F	TGGGTGCTGCGTTGTCCAAC
Setaria viridis		CMT3b_gRNA1	307_cmt3b_R	GCAGATGTCAAGAAGCTTCTCTACC
Setaria viridis	genotyping primer	CMT3a_gRNA2	304_cmt3a_F	GAAGATACATGGGAGCCCATTG
Setaria viridis		CMT3a_gRNA2	305_cmt3a_R	TCCTAGGTAGCCATCAGCAAAT
Setaria viridis	genotyping primer	CMT3a_gRNA1	302_cmt3a_F	GGGCTGTTGACCTCAACAGCT
Setaria viridis		CMT3a_gRNA1	303_cmt3a_R	AATAGAGGCCATTTTCTCTGCC
Setaria viridis	genotyping primer	CMT2_gRNA1	300_cmt2_F	GCCACCATGCCAAGGCATTA
Setaria viridis		CMT2_gRNA1	301_cmt2_R	CGAAAGCCAATGGGCAACCAT
Setaria viridis	genotyping primer	MET1b_gRANA2	316_met1b_F	GTGGGACACTGAGTAAGGACTT
Setaria viridis		MET1b_gRANA2	317_met1b_R	AGTAAGCTGGCAATGGATAGTCA
