# Supplementary material for: Dual Activities of an X-family DNA Polymerase Regulate CRISPR-Induced Insertional Mutagenesis Across Species
Source: Research Square preprint supplement (doi:10.21203/rs.3.rs-3851715/v1), 2024-01-19
Supplement: Supplementary file 3 [file a140c9777b906eeb57e2dfe7.xlsx]

## Sheet: Figure 1
Target site	species	predicted_in_delphi	predicted_forecast	observed
MCsite_T_1	Arabidopsis	24.2496	19	26.8183
MCsite_T_8	Arabidopsis	15.2788	19	10.9107
MCsite_T_7	Arabidopsis	24.2639	18.8	7.88823
MCsite_T_6	Arabidopsis	24.2413	19.1	13.5402
MCsite_T_1	Arabidopsis	24.2504	19.1	19.2839
MCsite_T_4	Arabidopsis	24.2496	19	26.8183
MCsite_T_3	Arabidopsis	24.2496	19	12.5974
MCsite_G_9	Arabidopsis	2.33348	1.7	45.9823
MCsite_G_8	Arabidopsis	2.32999	1.7	58.9036
MCsite_G_7	Arabidopsis	2.33112	1.7	55.9214
MCsite_G_5	Arabidopsis	2.33086	1.7	43.0676
MCsite_G_4	Arabidopsis	2.33112	1.7	51.3913
MCsite_G_3	Arabidopsis	2.33112	1.7	50.1776
MCsite_G_2	Arabidopsis	2.33124	1.7	41.9472
MCsite_G_1	Arabidopsis	2.33112	1.7	48.0161
fwa_gRNA9_C	Arabidopsis	10.1773	4.4	23.4805
fwa_gRNA8_G	Arabidopsis	5.16627	1.6	98.5254
fwa_gRNA17_A	Arabidopsis	20.6408	8.2	42.6829
fwa_gRNA_51_T	Arabidopsis	41.0564	10.5	1.99945
fwa_gRNA_50_C	Arabidopsis	11.454	2.5	18.3843
fwa_gRNA_41_T	Arabidopsis	24.573	7	93.2553
fwa_gRNA_39_A	Arabidopsis	28.2786	7.3	17.4318
fwa_gRNA_26_G	Arabidopsis	6.83669	4.3	30.7214
fwa_gRNA_18_G	Arabidopsis	2.96131	3.2	19.4936
fwa_gRNA_16_C	Arabidopsis	23.4326	5.1	57.9471
CHL2_gRNA	Arabidopsis	4.10054	3.6	25.5454
ms45_gRNA2	Setaria	5.28768	7.1	0.87465
ms45_gRNA1	Setaria	13.0211	15.9	3.8891
ms26_gRNA8	Setaria	18.958	3.2	17.6433
ms26_gRNA2	Setaria	12.0995	7.8	26.1737
ms26_gRNA1	Setaria	11.7552	7.3	43.4484
MET1a_gRNA2	Setaria	10.9201	9.4	2.38908
JK010_gRNA1	Setaria	10.0843	13.1	21.3045
JK008_gRNA1	Setaria	15.5752	14.4	40.1642
JK004_gRNA1	Setaria	4.53486	3.5	2.04563
JK003_gRNA1	Setaria	4.42364	3.1	0.545454
JK001_gRNA1	Setaria	5.12923	1.9	11.8644
IBM2_gRNA3	Setaria	14.9379	20	9.0011
IBM2_gRNA2	Setaria	6.46157	4.5	25.1474
IBM2_gRNA1	Setaria	5.46044	2.3	9.5721
HSFB2b_gRNA3	Setaria	7.48261	10.5	8.51064
hsfa6a1_gRNA2	Setaria	11.4663	8.2	7.14286
H2A.W_N	Setaria	9.15726	2	1.63627
H2A.W_C	Setaria	9.79758	24.6	4.63761
edm2c_gRNA3	Setaria	12.6089	23.7	4.18953
edm2c_gRNA2	Setaria	17.871	30.5	1.82421
edm2c_gRNA1	Setaria	8.59059	5.4	15.4767
edm2b_gRNA3	Setaria	7.49664	11.6	10.5223
edm2b_gRNA2	Setaria	14.657	11	8.88009
edm2b_gRNA1	Setaria	16.9161	0.41	9.81039
edm2a_gRNA3	Setaria	14.9213	25.4	4.74285
drm1b_gRNA2	Setaria	4.4901	0.6	7.61591
drm1b_gRNA1	Setaria	11.7477	45.3	0.917996
drm1a_gRNA1	Setaria	4.00972	18.3	7.51834
CMT3b_gRNA1	Setaria	28.332	11	1.91083
CMT3b_gRNA2	Setaria	40.4141	20.9	0
CMT3a_gRNA2	Setaria	6.68876	1.2	0
CMT3a_gRNA1	Setaria	17.359	3.8	6.34226
CMT2_gRNA1	Setaria	16.1042	4.9	4.53809

## Sheet: Figure 2a
	Insertion rates according to -4th mucleotide from each replication								Mean of insertion rates according to -4th nucleotide
species	fourth_nt	inserted_nt	Insertion_fraction				species	fourth_nt	inserted_nt	mean_Insertion_fraction	non-templated 1-bp insetion rates
setaria	A	A	60.2232				setaria	A	T	38.9536
setaria	A	A	60.1019				setaria	A	A	58.6988
setaria	A	A	16.0354				setaria	A	C	10.272
setaria	G	G	4.0367				setaria	A	G	8.15043
setaria	T	T	70.7233				setaria	C	T	32.2193
setaria	T	T	56.7568				setaria	C	A	25.733
setaria	G	G	1.57233				setaria	C	C	41.5332	66.034
setaria	T	T	81.1419				setaria	C	G	8.08168
setaria	C	C	99.7218				setaria	G	T	50.0597	99.4735
setaria	C	C	100				setaria	G	A	39.9537
setaria	C	C	85.8696				setaria	G	C	9.46009
setaria	A	A	67.8911				setaria	G	G	14.8495
setaria	A	A	100				setaria	T	T	75.6787
setaria	C	C	14.4009				setaria	T	A	17.6025
setaria	C	C	14.2857				setaria	T	C	6.08536
setaria	G	G	21.4286				setaria	T	G	4.30952
setaria	G	G	10.7143				Arabidopsis	A	T	32.8676
setaria	G	G	46.1538				Arabidopsis	A	A	58.4656
setaria	A	A	41.077				Arabidopsis	A	C	2.53023
setaria	C	C	12.1377				Arabidopsis	A	G	8.59124
setaria	C	C	14.2857				Arabidopsis	C	T	23.0102	61.4327
setaria	T	T	94.0928				Arabidopsis	C	A	35.8001
setaria	C	C	21.0084				Arabidopsis	C	C	39.0917
setaria	A	A	57.3248				Arabidopsis	C	G	2.62239
setaria	C	C	75.5474				Arabidopsis	G	T	43.2158	98.4115
setaria	C	C	19.6429				Arabidopsis	G	A	42.4573
setaria	A	A	100				Arabidopsis	G	C	12.7384
setaria	A	A	88.0952				Arabidopsis	G	G	12.1773
setaria	G	G	11.2331				Arabidopsis	T	T	78.793
setaria	G	G	5.61382				Arabidopsis	T	A	13.7292
setaria	A	A	60.9756				Arabidopsis	T	C	2.61431
setaria	A	A	13.2653				Arabidopsis	T	G	5.47149
setaria	C	C	15.0862				human	A	T	6.08357
setaria	C	C	26.4117				human	A	A	90.5219
setaria	A	A	0				human	A	C	1.7516
setaria	A	A	71.4286				human	A	G	1.64293
setaria	G	G	30.0493				human	C	T	14.9487
Arabidopsis	G	G	1.26582				human	C	A	10.1396
Arabidopsis	G	G	20				human	C	C	72.3207
Arabidopsis	G	G	2.40964				human	C	G	2.59102
Arabidopsis	G	G	6.66667				human	G	T	16.6669
Arabidopsis	G	G	6.66667				human	G	A	6.27572
Arabidopsis	G	G	2.9453				human	G	C	5.78456
Arabidopsis	G	G	3.21587				human	G	G	71.2728
Arabidopsis	G	G	3.7037				human	T	T	96.7188
Arabidopsis	G	G	25.8876				human	T	A	1.95845
Arabidopsis	C	C	62.4792				human	T	C	0.604482
Arabidopsis	A	A	97.3935				human	T	G	0.718304
Arabidopsis	C	C	67.7194
Arabidopsis	C	C	48.6117
Arabidopsis	A	A	97.3935
Arabidopsis	G	G	28.4618
Arabidopsis	G	G	44.2627
setaria	G	G	0.641483
setaria	G	G	2.84314
Arabidopsis	A	A	16.726
Arabidopsis	T	T	68.4322
Arabidopsis	C	C	6.91983
Arabidopsis	C	C	9.72851
Arabidopsis	T	T	71.9557
Arabidopsis	T	T	77.4194
Arabidopsis	T	T	87.5
Arabidopsis	T	T	69.6078
Arabidopsis	T	T	77.0563
Arabidopsis	T	T	91.0569
Arabidopsis	T	T	79.5699
Arabidopsis	T	T	86.5385
Arabidopsis	A	A	54.31
Arabidopsis	A	A	49.419
Arabidopsis	A	A	46.7813
Arabidopsis	A	A	47.236
human	A	A	81.54
human	C	C	57.7105
human	T	T	100
human	G	G	40.5282
human	C	C	26.1667
human	C	C	67.831
human	G	G	89.2308
human	G	G	91.7874
human	A	A	94.4444
human	A	A	98.0799
human	G	G	43.2779
human	G	G	97.8739
human	G	G	22.541
human	C	C	96.8233
human	C	C	3.60636
human	C	C	45.4988
human	T	T	98.7395
human	G	G	78.3035
human	T	T	99.8307
human	T	T	99.33
human	A	A	91.5
human	G	G	36.3132
human	C	C	45.0764
human	A	A	90.8613
human	A	A	85.6918
human	T	T	90.0621
human	C	C	86.168
human	A	A	74.6976
human	C	C	98.3968
human	C	C	0
human	T	T	97.6351
human	G	G	0.0459982
human	T	T	99.4575
human	A	A	89.2968
human	G	G	75.6948
human	A	A	93.1338
human	A	A	38.8054
human	C	C	50.1764
human	T	T	94.605
human	T	T	98.4387
human	T	T	99.7239
human	C	C	98.1132
human	G	G	94.9715
human	T	T	99.418
human	A	A	83.818
human	A	A	89.6801
human	T	T	81.318
human	A	A	97.7253
human	T	T	88.6926
human	T	T	97.7974
human	A	A	96.5355
human	A	A	73.9068
human	C	C	74.5941
human	A	A	97.8519
human	A	A	91.1281
human	A	A	80.6056
human	A	A	90.3243
human	T	T	75.7514
human	A	A	90.548
human	T	T	99.1689
human	A	A	87.5423
human	T	T	98.0288
human	A	A	90.6122
human	T	T	99.1115
human	G	G	79.1742
human	T	T	98.9529
human	A	A	99.0215
human	A	A	72.2609
human	T	T	99.3455
human	A	A	99.8926
human	A	A	83.7893
human	T	T	90.2143
human	C	C	97.1982
human	T	T	98.9172
human	A	A	96.7251
human	T	T	75.9201
human	C	C	98.5311
human	T	T	97.5679
human	A	A	91.5108
human	A	A	91.2442
human	T	T	98.6858
human	C	C	74.698
human	T	T	91.8451
human	A	A	26.4702
human	A	A	74.6841
human	A	A	98.7276
human	T	T	99.0756
human	A	A	76.7907
human	A	A	99.6512
human	C	C	97.9422
human	T	T	99.6367
human	C	C	0.222417
human	T	T	98.9468
human	A	A	99.5722
human	T	T	90.2621
human	A	A	99.027
human	T	T	99.9016
human	A	A	99.3157
human	T	T	99.0253
human	C	C	99.816
human	T	T	99.6324
human	A	A	99.9084
human	A	A	98.1013
human	C	C	99.4323
human	G	G	96.2936
human	T	T	97.9505
human	C	C	99.4467
human	A	A	99.1436
human	T	T	97.2159
human	T	T	99.3899
human	C	C	99.6226
human	C	C	0.214823
human	C	C	99.6263
human	C	C	99.4195
human	C	C	99.6306
human	C	C	99.5812
human	T	T	99.2534
human	C	C	98.8095
human	T	T	99.9546
human	A	A	99.7085
human	T	T	96.7168
human	G	G	99.2593
human	C	C	99.6026
human	G	G	97.9138
human	C	C	0.811486
human	A	A	99.1337
human	C	C	99.7368
human	T	T	99.6132
human	A	A	98.3614
human	A	A	98.0933
human	T	T	95.4807
human	T	T	99.808
human	A	A	99.6682
human	A	A	99.6905
human	A	A	99.8174
human	T	T	98.3198
human	A	A	99.664
human	G	G	97.1562
human	A	A	99.5498
human	A	A	99.6737
human	C	C	99.757
human	T	T	99.4704
human	T	T	99.8836
human	T	T	98.6094
human	A	A	99.7918
human	T	T	99.7012
human	A	A	99.8209
human	T	T	99.926
human	T	T	99.7616
human	T	T	99.8448

## Sheet: Figure 2d
	Insertion rates from each replicates
species	target_site	rep	fourth_nt	inserted_nt	Insertion proportion
Arabidopsis	iPAM_T	4	T	T	79.946				mean of insertion rates at the iPAM_G site
Arabidopsis	iPAM_T	4	T	A	12.6941
Arabidopsis	iPAM_T	4	T	G	6.2289			inserted_nt	species	mean_Insertion proportion	Insertion_type
Arabidopsis	iPAM_T	4	T	C	1.13099			A	Setaria	54.1263	Non-Templated
Arabidopsis	iPAM_G	1	G	A	53.4395			C	Setaria	4.09084	Non-Templated
Arabidopsis	iPAM_G	1	G	T	33.4997			G	Setaria	27.4392	Templated
Arabidopsis	iPAM_G	1	G	C	8.10774			T	Setaria	14.3437	Non-Templated
Arabidopsis	iPAM_G	1	G	G	4.95307			A	Human	7.36761	Non-Templated
Arabidopsis	iPAM_G	3	G	A	47.864			C	Human	4.46898	Non-Templated
Arabidopsis	iPAM_G	3	G	T	21.9098			G	Human	84.7659	Templated
Arabidopsis	iPAM_G	3	G	C	20.8041			T	Human	3.39751	Non-Templated
Arabidopsis	iPAM_G	3	G	G	9.42203			A	Arabidopsis	58.2447	Non-Templated
Arabidopsis	iPAM_T	2	T	T	93.5411			C	Arabidopsis	8.93308	Non-Templated
Arabidopsis	iPAM_T	2	T	A	3.66839			G	Arabidopsis	4.15197	Templated
Arabidopsis	iPAM_T	2	T	G	2.70914			T	Arabidopsis	28.6702	Non-Templated
Arabidopsis	iPAM_T	2	T	C	0.0813906
Arabidopsis	iPAM_T	3	T	T	87.3044				mean of insertion rates at the iPAM_T site
Arabidopsis	iPAM_T	3	T	A	6.45672
Arabidopsis	iPAM_T	3	T	G	5.94177			inserted_nt	species	Mean_insertion_proportion	Insertion_type
Arabidopsis	iPAM_T	3	T	C	0.297089			A	Setaria	15.55	Non-Templated
Arabidopsis	iPAM_G	2	G	A	64.4096			C	Setaria	4.86	Non-Templated
Arabidopsis	iPAM_G	2	G	T	22.8249			G	Setaria	6.26	Non-Templated
Arabidopsis	iPAM_G	2	G	C	9.58541			T	Setaria	73.33	Templated
Arabidopsis	iPAM_G	2	G	G	3.18001			A	Human	0.5	Non-Templated
Arabidopsis	iPAM_G	4	G	A	56.885			C	Human	2	Non-Templated
Arabidopsis	iPAM_G	4	G	T	29.6861			G	Human	0.6	Non-Templated
Arabidopsis	iPAM_G	4	G	C	9.10608			T	Human	97	Templated
Arabidopsis	iPAM_G	4	G	G	4.32283			A	Arabidopsis	7	Non-Templated
Arabidopsis	iPAM_G	5	G	A	40.1658			C	Arabidopsis	1.13	Non-Templated
Arabidopsis	iPAM_G	5	G	C	39.1258			G	Arabidopsis	4.96	Non-Templated
Arabidopsis	iPAM_G	5	G	T	15.8568			T	Arabidopsis	87	Templated
Arabidopsis	iPAM_G	5	G	G	4.85164
Human	iPAM_T	1	T	T	95.747
Human	iPAM_T	1	T	C	4.25304
Human	iPAM_T	2	T	T	98.092
Human	iPAM_T	2	T	A	1.09775
Human	iPAM_T	2	T	C	0.810246
Human	iPAM_T	3	T	T	97.2045
Human	iPAM_T	3	T	C	2.13884
Human	iPAM_T	3	T	G	0.637899
Human	iPAM_T	3	T	A	0.0187617
Human	iPAM_G	1	G	G	82.291
Human	iPAM_G	1	G	A	8.25969
Human	iPAM_G	1	G	T	5.03059
Human	iPAM_G	1	G	C	4.41876
Human	iPAM_G	2	G	G	87.6824
Human	iPAM_G	2	G	A	6.23697
Human	iPAM_G	2	G	C	3.19666
Human	iPAM_G	2	G	T	2.88395
Human	iPAM_G	3	G	G	84.3243
Human	iPAM_G	3	G	A	7.60618
Human	iPAM_G	3	G	C	5.79151
Human	iPAM_G	3	G	T	2.27799
Setaria	iPAM_T	1	T	T	72.6957
Setaria	iPAM_T	1	T	A	13.7391
Setaria	iPAM_T	1	T	G	8.34783
Setaria	iPAM_T	1	T	C	5.21739
Setaria	iPAM_T	2	T	T	76.5094
Setaria	iPAM_T	2	T	A	15.8491
Setaria	iPAM_T	2	T	G	4.5283
Setaria	iPAM_T	2	T	C	3.11321
Setaria	iPAM_T	3	T	T	70.777
Setaria	iPAM_T	3	T	A	17.0608
Setaria	iPAM_T	3	T	C	6.25
Setaria	iPAM_T	3	T	G	5.91216
Setaria	iPAM_G	1	G	A	43.128
Setaria	iPAM_G	1	G	G	37.4408
Setaria	iPAM_G	1	G	T	16.5877
Setaria	iPAM_G	1	G	C	2.8436
Setaria	iPAM_G	2	G	A	65.1246
Setaria	iPAM_G	2	G	G	17.4377
Setaria	iPAM_G	2	G	T	12.0996
Setaria	iPAM_G	2	G	C	5.33808

## Sheet: Figure 3a
	Insertion rates in each replication
species	target_site	rep	genotype	Insertion rate			Mean of insertion rates
Arabidopsis	MCsite_T_1	1	WT	27.7778			target_site	mean insertion rate
Arabidopsis	MCsite_T_1	2	WT	31.2919			MCsite_T_7	7.88823
Arabidopsis	MCsite_T_1	3	WT	21.3854			MCsite_T_3	12.5974
Arabidopsis	MCsite_T_3	1	WT	11.5395			MCsite_T_6	13.5402
Arabidopsis	MCsite_T_3	2	WT	8.20216			MCsite_T_8	10.9107
Arabidopsis	MCsite_T_3	3	WT	18.0504			MCsite_T_5	19.2839
Arabidopsis	MCsite_T_4	1	WT	22.9825			MCsite_T_1	26.8183
Arabidopsis	MCsite_T_4	2	WT	17.4975			MCsite_T_4	21.819
Arabidopsis	MCsite_T_4	3	WT	24.977
Arabidopsis	MCsite_T_5	1	WT	19.1419
Arabidopsis	MCsite_T_5	2	WT	23.2647
Arabidopsis	MCsite_T_5	3	WT	15.4451
Arabidopsis	MCsite_T_6	1	WT	16.5333
Arabidopsis	MCsite_T_6	2	WT	11.3137
Arabidopsis	MCsite_T_6	3	WT	12.7734
Arabidopsis	MCsite_T_7	1	WT	7.53262
Arabidopsis	MCsite_T_7	2	WT	5.75916
Arabidopsis	MCsite_T_7	3	WT	10.3729
Arabidopsis	MCsite_T_8	1	WT	10.7889
Arabidopsis	MCsite_T_8	2	WT	7.81476
Arabidopsis	MCsite_T_8	3	WT	14.1285

## Sheet: Figure 3a_heat_map
target_site	inserted_nt	Insertion rates
MCsite_T_7	A	11.538
MCsite_T_7	G	7.02323
MCsite_T_7	T	81.4388
MCsite_T_3	A	8.14649
MCsite_T_3	C	1.17931
MCsite_T_3	G	5.35068
MCsite_T_3	T	85.6799
MCsite_T_6	A	13.5435
MCsite_T_6	G	4.20802
MCsite_T_6	T	82.7311
MCsite_T_8	A	17.2041
MCsite_T_8	C	3.76859
MCsite_T_8	G	5.53106
MCsite_T_8	T	74.7525
MCsite_T_5	A	17.071
MCsite_T_5	C	24.3189
MCsite_T_5	G	5.42807
MCsite_T_5	T	61.2883
MCsite_T_1	A	18.2752
MCsite_T_1	G	3.38543
MCsite_T_1	T	78.3393
MCsite_T_4	A	14.132
MCsite_T_4	C	2.1361
MCsite_T_4	G	4.26745
MCsite_T_4	T	79.4644

## Sheet: Figure 3b
	Insertion rates in each replication
species	target_site	rep	genotype	Insertion rate				Mean of insertion_rate
Arabidopsis	MCsite4_gRNA1	1	WT	47.5138			target_site	name
Arabidopsis	MCsite4_gRNA1	2	WT	44.2089			MCsite4_gRNA8	58.9036
Arabidopsis	MCsite4_gRNA1	3	WT	52.3256			MCsite4_gRNA7	55.9214
Arabidopsis	MCsite4_gRNA2	1	WT	44.2089			MCsite4_gRNA4	51.3913
Arabidopsis	MCsite4_gRNA2	2	WT	50			MCsite4_gRNA9	45.9823
Arabidopsis	MCsite4_gRNA2	3	WT	31.6327			MCsite4_gRNA3	50.1776
Arabidopsis	MCsite4_gRNA3	1	WT	52.3256			MCsite4_gRNA1	48.0161
Arabidopsis	MCsite4_gRNA3	2	WT	51.5406			MCsite4_gRNA5	43.0676
Arabidopsis	MCsite4_gRNA3	3	WT	46.6667			MCsite4_gRNA2	41.9472
Arabidopsis	MCsite4_gRNA4	1	WT	59.9057
Arabidopsis	MCsite4_gRNA4	2	WT	52.6178
Arabidopsis	MCsite4_gRNA4	3	WT	41.6504
Arabidopsis	MCsite4_gRNA5	1	WT	35.8531
Arabidopsis	MCsite4_gRNA5	2	WT	57.1429
Arabidopsis	MCsite4_gRNA5	3	WT	36.2069
Arabidopsis	MCsite4_gRNA7	1	WT	70.9206
Arabidopsis	MCsite4_gRNA7	2	WT	50.9189
Arabidopsis	MCsite4_gRNA7	3	WT	45.9246
Arabidopsis	MCsite4_gRNA8	1	WT	47.5138
Arabidopsis	MCsite4_gRNA8	2	WT	76.5021
Arabidopsis	MCsite4_gRNA8	3	WT	52.6949
Arabidopsis	MCsite4_gRNA9	1	WT	49.7687
Arabidopsis	MCsite4_gRNA9	2	WT	38.9474
Arabidopsis	MCsite4_gRNA9	3	WT	49.2308

## Sheet: Figure 3b_heat_map
target_site	inserted_nt	insertion rates	non-templated rates
MCsite_G_8	A	37.6619	98.3324
MCsite_G_8	C	38.4253
MCsite_G_8	G	1.66756
MCsite_G_8	T	22.2452
MCsite_G_7	A	52.7201	97.8175
MCsite_G_7	C	15.8262
MCsite_G_7	G	2.18247
MCsite_G_7	T	29.2713
MCsite_G_4	A	47.1964	97.8124
MCsite_G_4	C	24.3485
MCsite_G_4	G	2.18757
MCsite_G_4	T	26.2676
MCsite_G_9	A	42.9909	99.7522
MCsite_G_9	C	25.9196
MCsite_G_9	G	0.743494
MCsite_G_9	T	30.8416
MCsite_G_3	A	55.4013	98.1646
MCsite_G_3	C	11.1388
MCsite_G_3	G	2.75306
MCsite_G_3	T	31.6245
MCsite_G_1	A	43.0526	94.0102
MCsite_G_1	C	25.3176
MCsite_G_1	G	5.98977
MCsite_G_1	T	25.64
MCsite_G_5	A	39.8642	96.3645
MCsite_G_5	C	21.5003
MCsite_G_5	G	4
MCsite_G_5	T	35
MCsite_G_2	A	42	93
MCsite_G_2	C	17
MCsite_G_2	G	7
MCsite_G_2	T	34

## Sheet: Figure 4a
target_site	rep	genotype	overall mutagenesis rates	mean	Student t-test one tailed, unpaired
Chl2	1	WT	29.858	38.8651	0.45241	WT VS Pol_L
Chl2	2	WT	51.9381
Chl2	3	WT	34.7991
Chl2	1	Pol_L	32.4877	37.9162
Chl2	2	Pol_L	40.3135
Chl2	3	Pol_L	40.9474

## Sheet: Figure 4b
target_site	rep	genotype	insertion_rate	mean	Student t-test one tail, unpaired
Chl2	1	WT	24.058	25.2659	7.91001e-05	WT VS Pol_L
Chl2	2	WT	25.8975
Chl2	3	WT	25.8423
Chl2	1	Pol_L	0.63317	0.211057
Chl2	2	Pol_L	0
Chl2	3	Pol_L	0

## Sheet: Figure 4c
species	deletion_type	target_site	rep	genotype	deletion_rate	t test one tailed unpaired	mean
Arabidopsis	2-10bp	Chl2	1	WT	81.8975	0.109962	85.3868
Arabidopsis	2-10bp	Chl2	2	WT	95.9179
Arabidopsis	2-10bp	Chl2	3	WT	78.3451
Arabidopsis	2-10bp	Chl2	1	Pol_L	76.0055		75.9754
Arabidopsis	2-10bp	Chl2	2	Pol_L	74.7538
Arabidopsis	2-10bp	Chl2	3	Pol_L	77.1669
Arabidopsis	1bp	Chl2	1	WT	12.3404	0.358658	12.5468
Arabidopsis	1bp	Chl2	2	WT	11.1
Arabidopsis	1bp	Chl2	3	WT	14.2
Arabidopsis	1bp	Chl2	1	Pol_L	15		13.1
Arabidopsis	1bp	Chl2	2	Pol_L	11.2
Arabidopsis	1bp	Chl2	3	Pol_L	13.1
Arabidopsis	>10bp	Chl2	1	WT	5.76207	0.104424	6.95688
Arabidopsis	>10bp	Chl2	2	WT	4.08207
Arabidopsis	>10bp	Chl2	3	WT	11.0265
Arabidopsis	>10bp	Chl2	1	Pol_L	9.00308		10.9313
Arabidopsis	>10bp	Chl2	2	Pol_L	14.0487
Arabidopsis	>10bp	Chl2	3	Pol_L	9.74212

[truncated: 10 more sheets: Figure 4d, Figure 4e, Figure 5a, Figure 5a_heat_map, Figure 5b, Figure 5b_heat_map, Figure 2c, Supplementary Fig S1, Supplementary Fig S2, Supplementary Fig S3]
