# Supplementary material for: Dual Activities of an X-family DNA Polymerase Regulate CRISPR-Induced Insertional Mutagenesis Across Species
Source: Research Square preprint supplement (doi:10.21203/rs.3.rs-3851715/v1), 2024-01-19
Supplement: Supplementary file 4 [file e919550753ebc9dd186054e9.xlsx]

## Sheet: Sheet1
Supplementary Table 2: Protein sequences of X-family DNA polymerases
1. >Polymerase lambda [Homo sapiens] MDPRGILKAFPKRQKIHADASSKVLAKIPRREEGEEAEEWLSSLRAHVVRTGIGRARAELFEKQIVQHGG QLCPAQGPGVTHIVVDEGMDYERALRLLRLPQLPPGAQLVKSAWLSLCLQERRLVDVAGFSIFIPSRYLD HPQPSKAEQDASIPPGTHEALLQTALSPPPPPTRPVSPPQKAKEAPNTQAQPISDDEASDGEETQVSAAD LEALISGHYPTSLEGDCEPSPAPAVLDKWVCAQPSSQKATNHNLHITEKLEVLAKAYSVQGDKWRALGYA KAINALKSFHKPVTSYQEACSIPGIGKRMAEKIIEILESGHLRKLDHISESVPVLELFSNIWGAGTKTAQ MWYQQGF…
2. >Polymerase lambda [Mus musculus] MDPQGIVKAFPKRKKSHADLSSKALAKIPKREVGEARGWLSSLRAHIMPAGIGRARAELFEKQIIHHGGQ VCSAQAPGVTHIVVDEDMDYERALRLLRLPQLPPGAQLVKSTWLSLCLQEGRLTDTEGFSLPMPKRSLDE PQPSKSGQDASAPGTQRDLPRTTLSLSPPHTRAVSPPPTAEKPSRTQAQLSSEDETSDGEGPQVSSADLQ ALITGHYPTPPEEDGGPDPAPEALDKWVCAQPSSQKATNYNLHITEKLEVLAKAYSVQGDKWRALGYAKA INALKSFHKPVSSYQEACSIPGIGKRMAEKVMEILESGHLRKLDHISDSVPVLELFSNIWGAGTKTAQMW YHQGFRN…
3.>Polymerase lambda [Arabidopsis thaliana] MAAKRGRNRSPSPDPEGMFAGMVVFMVEIGVQRRRLQIWKQKLVQMGAVIEEDRVTKKVTHVLAMNLEALLHKFGKERLSHFTARLMLYQWLEDSLTSGEKANEDLYVLKIDSEEVDKPKKSLPAISGSEDQSSPQKRTRYSPDAGDFKGVESHSNTQGSPDSPTSCSVPSTSASPGEGIAETPTSPQSESTSVYKPPDLNRNITEIFGKLINIYRALGEDRRSFSYYKAIPVIEKFPTRIESVDQLKHLPGIGKAMRDHIQEIVTTGKLSKLEHFETDEKVRTISLFGEVWGVGPATALKLYEKGHRTLEDLKNEDSLTHAQKLGLKYFDDIKTRIPRQEVQEMEQLLQRVGEE…
4. >Polymerase lambda [Nicotiana tabacum] MAPKKDKSPLSDPDGMFSGMVVFLIETGVQSRRLQIWKQKLVQMGAKIEDPFSKNVTHVFAMDANSLLQK VDRERLSRFKAKLLAYQWLEDSLTKGEKASEDLYVLSLQSRGGSLSPKADNGSHPNSSEITPKKSRSSTE DAKNASPRHMNDTKELVVDDSQDTKSASSLASRSSSPEVTSSEVIDSHNNPVGTSDSSSLYKPPDLNRNI TEIFGKLINIYRALGDDRRSFSYYKAIPVIEKLPFKIESVDQVKHLPAIGKSMQDHIQEIVTTGKLSKLE HFEKDEKVKTISLFGEVWGIGPATALKLYEKGHRTLDDLKNEDSLTHSQRLGLKYFDDIQTRIPRHEVEE ME…
5. >Polymerase lambda [Oryza sativa] MAPKRKPPARAAAAKLDPDGMFRGVSAFVVPHAVQSRRLEVWKQRLAQMGGRVQEKLAAKGGGGAVTHVLAADAKALLRELDAAWLHRFRGSVVSFEWLEECLKSGERLPEHKFAINYEEEFKPKKEGGAAGSGVLQSAK RSKISSDGPENRKETAGGNRESRDAIAHPNEDSDVVKGPSTCTSSQSASGDSKETIASQNAFKAEEASSG ESSTYAPPDLNRNITEIFGKLINIYRALGDDRRSFSYYKAIPVIEKLPFKIESADQVKDLPAIGKSLKDH INEIVNTGKLSKLEHFENDEKVRTVSLFGEVWGVGPATALKLYDKGHRTLDDLQKDDSLTSAQRIGLKFF DDIKQRIP…
6. >Polymerase lambda [Setaria viridis] MAPKRKPARGAAAEERDPDGMFRGVSAFIVPHGVQTRRLEVWKQRLVQMGGRVVEKVDKGGAAGGANHVLAMDAKALLRELDAAWLHRFRGSVVSFEWLEECLKSGKRLPEHKFAINYEGEFKRKKAAGNGDSGASQSAK RSKISSEDLGDQQRTSGGDREEHSDASADKGSGVETKPNQYAISQSSSGDTKNTVASHGTFDIEEASSGG PSIYAPADLNRNITSIFGRLIDIYRALGEDRRSFSYYKAIPVIEKLPFKIESAEQVKDLPTIGKSLRDHI NEIVTTGKLSKLEHFENDEKVRTISLFGEVWGVGPATAVKLYEKGHRTLDDLRKDESLTNAQRIGLKYFD DIKQR…
7. >Polymerase IV [Saccharomyces cerevisiae] MSLKGKFFAFLPNPNTSSNKFFKSILEKKGATIVSSIQNCLQSSRKEVVILIEDSFVDSDMHLTQKDIFQ REAGLNDVDEFLGKIEQSGIQCVKTSCITKWVQNDKFAFQKDDLIKFQPSIIVISDNADDGQSSTDKESE ISTDVESERNDDSNNKDMIQASKPLKRLLQGDKGRASLVTDKTKYKNNELIIGALKRLTKKYEIEGEKFR ARSYRLAKQSMENCDFNVRSGEEAHTKLRNIGPSIAKKIQVILDTGVLPGLNDSVGLEDKLKYFKNCYGI GSEIAKRWNLLNFESFCVAAKKDPEEFVSDWTILFGWSYYDDWLCKMSRNECFTHLKKVQKALRGIDPEC…
8. >Polymerase beta [Homo sapiens] MSKRKAPQETLNGGITDMLTELANFEKNVSQAIHKYNAYRKAASVIAKYPHKIKSGAEAKKLPGVGTKIA EKIDEFLATGKLRKLEKIRQDDTSSSINFLTRVSGIGPSAARKFVDEGIKTLEDLRKNEDKLNHHQRIGL KYFGDFEKRIPREEMLQMQDIVLNEVKKVDSEYIATVCGSFRRGAESSGDMDVLLTHPSFTSESTKQPKL LHQVVEQLQKVHFITDTLSKGETKFMGVCQLPSKNDEKEYPHRRIDIRLIPKDQYYCGVLYFTGSDIFNK NMRAHALEKGFTINEYTIRPLGVTGVAGEPLPVDSEKDIFDYIQWKYREPKDRSE
9. >Polymerase mu [Homo sapiens] MLPKRRRARVGSPSGDAASSTPPSTRFPGVAIYLVEPRMGRSRRAFLTGLARSKGFRVLDACSSEATHVV MEETSAEEAVSWQERRMAAAPPGCTPPALLDISWLTESLGAGQPVPVECRHRLEVAGPRKGPLSPAWMPA YACQRPTPLTHHNTGLSEALEILAEAAGFEGSEGRLLTFCRAASVLKALPSPVTTLSQLQGLPHFGEHSS RVVQELLEHGVCEEVERVRRSERYQTMKLFTQIFGVGVKTADRWYREGLRTLDDLREQPQKLTQQQKAGL QHHQDLSTPVLRSDVDALQQVVEEAVGQALPGATVTLTGGFRRGKLQGHDVDFLITHPKEGQEAGLLPRV MCRLQDQGLIL…
10. >TdT [Homo sapiens] MDPPRASHLSPRKKRPRQTGALMASSPQDIKFQDLVVFILEKKMGTTRRAFLMELARRKGFRVENELSDS VTHIVAENNSGSDVLEWLQAQKVQVSSQPELLDVSWLIECIRAGKPVEMTGKHQLVVRRDYSDSTNPGPP KTPPIAVQKISQYACQRRTTLNNCNQIFTDAFDILAENCEFRENEDSCVTFMRAASVLKSLPFTIISMKD TEGIPCLGSKVKGIIEEIIEDGESSEVKAVLNDERYQSFKLFTSVFGVGLKTSEKWFRMGFRTLSKVRSD KSLKFTRMQKAGFLYYEDLVSCVTRAEAEAVSVLVKEAVWAFLPDAFVTMTGGFRRGKKMGHDVDFLITS PGSTEDEEQLLQKVMNLWEK…
11. >Polymerase beta [Mus musculus] MYCSVVLYMTLIVYDPAARKFVDEGIKTLEDLRKNEDKLNHHQRIGLKYFEDFEKRIPREEMLQMQDIVL NEIKKVDSEYIATVCGSFRRGAESSGDMDVLLTHPNFTSESSKQPKLLHRVVEQLQKVHFITDTLSKGET KFMGVCQLPSEKDGKEYPHRRIDIRLIPKDQYYCGVLYFTGSDIFNKNMRAHALEKGFTINEYTIRPLGV TGVAGEPLPVDSEQDIFDYIQWRYREPKDRSE
12. >Polymerase mu [Mus musculus] MEGTSAKEAICWQKNMDALPTGCPQPALLDISWFTESMAAGQPVPEEGRHHLEVAEPRKEPPVSASMPAY ACQRPSPLTHHNTLLSEALETLAEAAGFEANEGRLLSFSRAASVLKSLPCPVASLSQLHGLPYFGEHSTR VIQELLEHGTCEEVKQVRCSERYQTMKLFTQVFGVGVKTANRWYQEGLRTLDELREQPQRLTQQQKAGLQ YYQDLSTPVRRADAEALQQLIEAAVRQTLPGATVTLTGGFRRGKLQGHDVDFLITHPEEGQEVGLLPKVM SCLQSQGLVLYHQYHRSHLADSAHNLRQRSSTMDAFERSFCILGLPQPQQAALAGALPPCPTWKAVRVDL VVTPSSQFPF…
13. >TdT [Mus musculus] MDPLQAVHLGPRKKRPRQLGTPVASTPYDIRFRDLVLFILEKKMGTTRRAFLMELARRKGFRVENELSDS VTHIVAENNSGSDVLEWLQLQNIKASSELELLDISWLIECMGAGKPVEMMGRHQLVVNRNSSPSPVPGSQ NVPAPAVKKISQYACQRRTTLNNYNQLFTDALDILAENDELRENEGSCLAFMRASSVLKSLPFPITSMKD TEGIPCLGDKVKSIIEGIIEDGESSEAKAVLNDERYKSFKLFTSVFGVGLKTAEKWFRMGFRTLSKIQSD KSLRFTQMQKAGFLYYEDLVSCVNRPEAEAVSMLVKEAVVTFLPDALVTMTGGFRRGKMTGHDVDFLITS PEATEDEEQQLLHKVTDFWK…
